# Supplementary material for: Atomic-Scale Observation of Polar Solvation Dynamics Triggered by Photoinduced Charge Transfer in an Organic Chromophore
Source: Research Square preprint supplement (doi:10.21203/rs.3.rs-7775086/v1), 2025-11-04
Supplement: Supplementary file 1 [file 70d2ff90c91a80f55ddf909e.pdf]

# Supplementary Information for: Atomic-Scale Observation of Polar Solvation Dynamics Triggered by Photoinduced Charge Transfer in an Organic Chromophore

Kerstin M. Mitterer<sup>1\*</sup>, Elli Selenius<sup>2</sup>, Morten L. Haubro<sup>1</sup>, Magnus  
A. H. Christiansen<sup>2</sup>, Verena Markmann<sup>1</sup>, Bianca L. Hansen<sup>1</sup>,  
Mikkel Krell-Jørgensen<sup>3</sup>, Joseph G. F. Hoock<sup>3</sup>, Victor Lorentzen<sup>1</sup>,  
Emma V. Beale<sup>4</sup>, Philip J. M. Johnson<sup>4</sup>, David J. Gosztola<sup>5</sup>,  
Claudio Cirelli<sup>4</sup>, Camila Bacellar<sup>4</sup>, Asmus O. Dohn<sup>1</sup>, Luca Laraia<sup>3</sup>,  
Klaus B. Møller<sup>3</sup>, Kristoffer Haldrup<sup>1</sup>, Gianluca Levi<sup>2,6\*†</sup>, Martin  
M. Nielsen<sup>1\*†</sup>

<sup>1</sup>Department of Physics, Technical University of Denmark, 2800 Kongens  
Lyngby, Denmark.

<sup>2</sup>Science Institute and Faculty of Physical Sciences, University of Iceland,  
Reykjavík, Iceland.

<sup>3</sup>Department of Chemistry, Technical University of Denmark, 2800  
Kongens Lyngby, Denmark.

<sup>4</sup>Paul Scherrer Institut, Villigen PSI, Switzerland.

<sup>5</sup>Center for Nanoscale Materials, Argonne National Laboratory, 9700 S  
Cass Ave, Lemont, Illinois 60439, United States.

<sup>6</sup>Department of Chemical and Pharmaceutical Sciences, University of  
Trieste, 34127 Trieste, Italy.

\*Corresponding author(s). E-mail(s): [kmitt@dtu.dk](mailto:kmitt@dtu.dk); [giale@hi.is](mailto:giale@hi.is);  
[mmee@fysik.dtu.dk](mailto:mmee@fysik.dtu.dk);

<sup>†</sup>These authors contributed equally to this work

## Supplementary Notes

|           |                                                                |           |
|-----------|----------------------------------------------------------------|-----------|
| <b>1</b>  | <b>Sample synthesis and preparation</b>                        | <b>3</b>  |
| <b>2</b>  | <b>Stationary absorption spectrum of HTI-J in acetonitrile</b> | <b>10</b> |
| <b>3</b>  | <b>Optical transient absorption spectroscopy</b>               | <b>10</b> |
| <b>4</b>  | <b>Time-resolved X-ray solution scattering</b>                 | <b>13</b> |
| 4.1       | Power titration . . . . .                                      | 13        |
| 4.2       | Reduction of TR-XSS data . . . . .                             | 14        |
| 4.3       | Time zero and time resolution . . . . .                        | 16        |
| 4.4       | Liquid unit cell scaling . . . . .                             | 18        |
| 4.5       | Identification of background artifact components . . . . .     | 19        |
| 4.6       | Noise estimation . . . . .                                     | 21        |
| <b>5</b>  | <b>Identification of signal components in the TR-XSS data</b>  | <b>21</b> |
| 5.1       | Bulk solvent heating . . . . .                                 | 21        |
| 5.2       | Vibrational relaxation of the solute . . . . .                 | 22        |
| 5.3       | Optical Kerr effect . . . . .                                  | 23        |
| 5.4       | Solute and solvation shell structural rearrangement . . . . .  | 24        |
| <b>6</b>  | <b>Global fitting of the TR-XSS data</b>                       | <b>26</b> |
| 6.1       | Regularization . . . . .                                       | 27        |
| 6.2       | Global fitting results . . . . .                               | 27        |
| <b>7</b>  | <b>Kinetic functions</b>                                       | <b>31</b> |
| 7.1       | Double exponential rise . . . . .                              | 31        |
| 7.2       | Single exponential rise and decay . . . . .                    | 31        |
| 7.3       | Step-function rise and single exponential decay . . . . .      | 32        |
| <b>8</b>  | <b>Energy deposition into the solvent</b>                      | <b>32</b> |
| <b>9</b>  | <b>Density functional theory calculations</b>                  | <b>33</b> |
| <b>10</b> | <b>Molecular dynamics simulations</b>                          | <b>36</b> |
| 10.1      | Equilibrium molecular dynamics simulations . . . . .           | 36        |
| 10.2      | Nonequilibrium molecular dynamics simulations . . . . .        | 38        |

# 1 Sample synthesis and preparation

## General directions

All reactions were run under a N<sub>2</sub> atmosphere unless otherwise specified and were monitored by thin layer chromatography (TLC) and/or reversed-phase ultra-performance liquid chromatography mass spectrometry (RP-UPLC-MS). Commercially available reagents were purified according to standard procedures or were used as received from Sigma Aldrich, Alfa Aesar, Acros Organics, Combi-Blocks, Fisher Scientific, Strem, and Merck. All solvents used were of High-Performance Liquid Chromatography (HPLC) quality and dry solvents (DCM, Et<sub>2</sub>O, THF, and Toluene) were obtained from a Pure-Solv system (Innovative Technology, Tronxy). Methanol was stored over activated 3 Å molecular sieves before use. Analytical TLC was conducted on Merck aluminium sheets covered with silica (C60). The plates were either visualized under UV-light or stained by dipping in a developing agent followed by heating. KMnO<sub>4</sub> [KMnO<sub>4</sub> (3 g) in water (300 mL), K<sub>2</sub>CO<sub>3</sub> (20 g) and 5% aqueous NaOH (5 mL)] and cerium molybdate [Ce(NH<sub>4</sub>)<sub>2</sub>(NO<sub>3</sub>)<sub>6</sub> (0.5g), (NH<sub>4</sub>)<sub>6</sub>Mo<sub>7</sub>O<sub>24</sub>·4H<sub>2</sub>O (24.0 g), and H<sub>2</sub>SO<sub>4</sub> (24.0 g)] were used as developing agents. Flash column chromatography was performed using Merck Geduran® Si 60 (40-63 µm) silica gel.

All new compounds were characterized by Nuclear Magnetic Resonance (NMR), Mass Spectrometry (Electrospray Ionization) (MS (ESI)), and High-Resolution Mass Spectrometry (HRMS) (ESI) (byproducts were not fully characterized). Structural assignments were made when possible for new compounds using COSY (Correlation Spectroscopy), HSQC (Heteronuclear Single Quantum Coherence), NOESY (Nuclear Overhauser Effect Spectroscopy), HMBC (Heteronuclear Multiple Bond Correlation), H2BC (Heteronuclear Two Bond Correlation) spectra where appropriate. For the recording of <sup>1</sup>H NMR and <sup>13</sup>C NMR spectra, a Bruker Ascend with a Prodigy cryoprobe (operating at 400 MHz for proton and 100 MHz for carbon) was used. The chemical shifts (δ) are reported in parts per million (ppm) and the coupling constants (J) in Hz. Spectra were referenced using the residual solvent peaks of the respective solvent; DMSO (δ 2.50 ppm for <sup>1</sup>H NMR and δ 39.52 ppm for <sup>13</sup>C NMR), CDCl<sub>3</sub> (δ 7.26 ppm for <sup>1</sup>H NMR and δ 77.16 ppm for <sup>13</sup>C NMR), CD<sub>3</sub>OD (δ 3.31 ppm for <sup>1</sup>H NMR and δ 49.00 ppm for <sup>13</sup>C NMR). The following abbreviations were used to report peak multiplicities: s = singlet, d = doublet, t = triplet, q = quartet, dd = doublet of doublets, sept = septet, m = multiplet, bs = broad singlet. Analytical RP-UPLC-MS (ESI) analysis was performed on a S2 Waters AQUITY RP-UPLC system equipped with a diode array detector using an Thermo Accucore C18 column (d 2.6 µm, 2.1 x 50 mm; column temp: 50 °C; flow: 1.0 mL/min). Eluents A (0.1% HCO<sub>2</sub>H in H<sub>2</sub>O) and B (0.1% HCO<sub>2</sub>H in MeCN) were used in a linear gradient (5% B to 100% B) in 2.4 min and then held for 0.1 min at 100% B (total run time: 2.6 min). The LC system was coupled to a SQD mass spectrometer. Analytical LC-HRMS (ESI) analysis was performed on a Waters Alliance 2695 system. Samples were injected directly and the LC system was coupled to a Waters LCT Premier XE Micromass equipped with a Lock Mass probe operating in positive electrospray mode. Eluents A (0.1% HCO<sub>2</sub>H in H<sub>2</sub>O) and B (0.1% HCO<sub>2</sub>H in MeCN) were used in a 1:1 ratio for a total run time of 2 min.

Figure S1 depicts the general synthetic scheme used in this work for the synthesis of (*Z*)-2-((8,10-dimethyl-2,3,6,7-tetrahydro-1*H*,5*H*-pyrido[3,2,1-*ij*]quinolin-9-yl)methylene)benzo[*b*]thiophen-3(2*H*)-one (referred to as HTI-J in the main article).

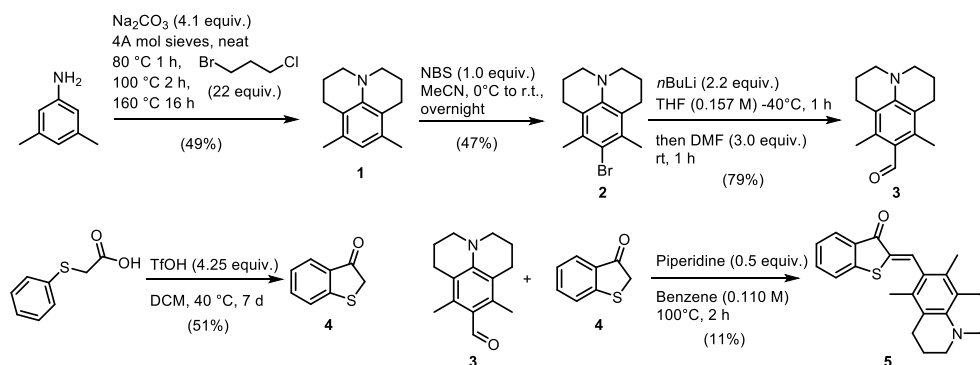

**Fig. S1** Synthetic scheme for the synthesis of (*Z*)-2-((8,10-dimethyl-2,3,6,7-tetrahydro-1*H*,5*H*-pyrido[3,2,1-*ij*]quinolin-9-yl)methylene)benzo[*b*]thiophen-3(2*H*)-one (**5**, referred to as HTI-J in the main article). Each step was adapted for larger scale synthesis from literature reports as indicated and repeated multiple times. The yields of one specific experiment are shown. NBS = N-bromosuccinimide; *n*BuLi = *n*-butyllithium; TfOH = trifluoromethanesulfonic acid (triflic acid); MeCN = acetonitrile; THF = tetrahydrofuran; DMF = N,N-dimethylformamide; DCM = dichloromethane.

## Building block syntheses

8,10-dimethyl-2,3,6,7-tetrahydro-1*H*,5*H*-pyrido[3,2,1-*ij*]quinoline(3,5-dimethyljulolidine) (**1**) [1, 2]

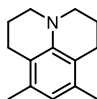

3,5-Dimethylaniline (14.4 g, 116.10 mmol, 1.0 equiv.), 1-bromo-3-chloropropane (397.4 g, 2.52 mol, 21.75 equiv.), sodium carbonate (57.7 g, 482.8 mmol 4.2 equiv., oven dried at 300 °C for 4 hours) and 4 Å molecular sieves (12.25 g activated at 300 °C over night) were added to a flame dried 1 L round bottom flask under a nitrogen atmosphere. The following heating rate was applied: 1 hr. at 80 °C, 2 hr. at 100 °C, 12 hr. at 160 °C. The reaction mixture was cooled to room temperature, diluted with DCM, then washed successively with: 10% HCl, twice with water, once with 10% NaOH and twice with water. The organic fraction was dried over NaSO<sub>4</sub>, evaporated to dryness and then purified by flash column chromatography on silica gel (hexanes/DCM 60% to 100%), which afforded the title compound **1** as a white crystalline powder (15.7 g, 49% yield). Characterization data matched the previously

reported data: **<sup>1</sup>H NMR** (400 MHz, CDCl<sub>3</sub>): δ 6.39 (s, 1H), 3.11 – 3.02 (m, 4H), 2.64 (t, *J* = 6.8 Hz, 4H), 2.13 (s, 6H), 2.08 – 1.97 (m, 4H) ppm. **<sup>13</sup>C NMR** (101 MHz, CDCl<sub>3</sub>): δ 143.8, 133.9, 120.5, 118.5, 50.3, 25.0, 22.6, 19.7 ppm. **LCMS (ESI)**: *m/z* [M + H]<sup>+</sup> calcd for C<sub>14</sub>H<sub>20</sub>N<sup>+</sup> 202.2; found 202.0.

9-bromo-8,10-dimethyl-2,3,6,7-tetrahydro-1*H*,5*H*-pyrido[3,2,1-*ij*]quinoline (**2**) [1]

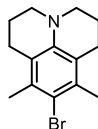

A solution of N-bromosuccinimide (11.67 g, 65.57 mmol, 1.0 equiv.) in MeCN (160 mL) was added dropwise into a solution of 3,5-dimethyljulolidine **1** (13.20 g, 65.57 mmol, 1 equiv.) in MeCN (160 mL) at 0 °C. The resultant suspension was stirred vigorously overnight. After removing all the volatiles under reduced pressure, the residual solid was dissolved in excess amount of DCM and washed with brine. The organic phase was collected, dried with Na<sub>2</sub>SO<sub>4</sub>, evaporated to dryness and purified by flash chromatography on silica (hexanes/DCM 25%) provided the title compound as white crystalline powder (8.6 g, yield 47%). Characterization data matched the previously reported data: **<sup>1</sup>H NMR** (400 MHz, CDCl<sub>3</sub>): δ 3.07 – 3.01 (m, 4H), 2.70 (t, *J* = 6.8 Hz, 4H), 2.32 (s, 6H), 2.07 – 1.95 (m, 4H) ppm. **<sup>13</sup>C NMR** (101 MHz, CDCl<sub>3</sub>): δ 143.2, 133.6, 120.1, 116.9, 50.1, 26.7, 22.7, 20.3 ppm. **LCMS (ESI)**: *m/z* [M + H]<sup>+</sup> calcd for C<sub>14</sub>H<sub>19</sub>BrN<sup>+</sup> 282.1; found 281.8.

8,10-dimethyl-2,3,6,7-tetrahydro-1*H*,5*H*-pyrido[3,2,1-*ij*]quinoline-9-carbaldehyde(3,5-dimethyl-4-formyljulolidine) (**3**) [3]

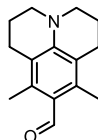

3,5-dimethyl-4-formyljulolidine **3** was accessed via a hitherto unpublished procedure provided by Dube and coworkers (*personal communication*): Under an argon atmosphere, bromide **2** (7.4 g, 26.4 mmol, 1.0 equiv.) was dissolved in anhydrous THF (140 mL) and cooled to –40 °C. *n*-BuLi (2.3 M in hexanes, 25.3 mL, 58.1 mmol, 2.20 equiv.) was added dropwise via a cannula and the solution was stirred at –40 °C for 1 h, then anhydrous DMF (0.165 mL, 2.14 mmol, 1.20 equiv.) was added. The mixture was stirred at –40 °C for 15 min, then the temperature was allowed to raise to ambient temperature at which the mixture was further stirred for 1 hr. A saturated aqueous solution of ammonium chloride (300 mL) was added and the aqueous phase was extracted with DCM (3 × 150 mL). The combined organic phases were dried over

Na<sub>2</sub>SO<sub>4</sub>, evaporated to dryness and purified by flash column chromatography on silica (hexane/EtOAc 5 % to 10 %), which afforded title compound **3** as an off white solid (4.77 g, 79% yield). Characterization data matched the previously reported data: <sup>1</sup>H NMR (400 MHz, CDCl<sub>3</sub>): δ 10.43 (s, 1H), 3.24 – 3.17 (m, 4H), 2.67 (t, *J* = 6.6 Hz, 4H), 2.43 (s, 6H), 2.03 – 1.92 (m, 4H) ppm. LCMS (ESI): *m/z* [M + H]<sup>+</sup> calcd for C<sub>15</sub>H<sub>20</sub>NO<sup>+</sup> 230.2; found 230.3.

Benzo[*b*]thiophen-3(2*H*)-one (**4**) [4]

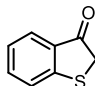

To an oven-dried 500 mL flask equipped with a magnetic stir bar and a condenser were added thiophenoxy acetic acid (17.5 g, 100 mmol, 1.0 equiv.) and DCM (175 mL, 0.57 M). The solution was purged with nitrogen for 5 min. TfOH (37.5 mL, 424.5 mmol, 4.25 eq.) was carefully added in four portions at the 0 h, 14 h, 64 h and 85 h time points. After the first TfOH addition, the reaction flask was purged with argon and then placed into a prewarmed oil bath at 40°C. The reaction mixture was continuously stirred at 40°C for 7 days in total, after which no SM was observed via TLC. The reaction mixture was cooled to room temperature and carefully poured into a beaker with ice (~1500 mL). Ethyl acetate (1500 mL) was added. The organic layer was separated and the aqueous layer was further extracted with Ethyl acetate (1000 mL). The combined organic layers were washed with sat. aq. NaHCO<sub>3</sub> (1000 mL) and brine (500 mL), dried over anhydrous Na<sub>2</sub>SO<sub>4</sub>, filtered and concentrated under reduced pressure by rotary evaporation to provide the title compound **4** as a yellow/orange solid crude product (8.5 g, 90% purity, 52% yield), which was used in the next step without further purification.

### HTI-J synthesis

(*Z*)-2-((8,10-dimethyl-2,3,6,7-tetrahydro-1*H*,5*H*-pyrido[3,2,1-*ij*]quinolin-9-yl)methylene)benzo[*b*]thiophen-3(2*H*)-one (**5**) [3]

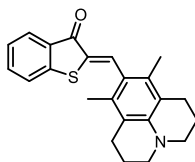

Benzo[*b*]thiophen-3(2*H*)-one **4** (2.5 g, 14.15 mmol, 1.0 equiv., 90% pure), benzene (130 mL, bubbled with argon), 3,5-dimethyl-4-formyljulolidine **3** (3.24 g, 14.15 mmol), and piperidine (0.8 mL, 0.5 equiv.) were added to a dry round bottom flask (500 mL). The reaction mixture was stirred for 2 h at 100 °C. After cooling to room temperature, a saturated NH<sub>4</sub>Cl solution (150 mL) was added. The aqueous phase was extracted

with EtOAc (3 x 200 mL). The organic phases were combined, dried over Na<sub>2</sub>SO<sub>4</sub> and evaporated to dryness. The crude product was purified by column chromatography on silica. The solid obtained by concentration had to be repurified by washing with pure hexanes to afford title compound **5** (709.0 mg, 12%) as dark red solid. Characterization data matched the previously reported data: **<sup>1</sup>H NMR** (400 MHz, CDCl<sub>3</sub>): δ 8.14 (s, 1H), 7.92 (dt, *J* = 7.8, 1.0 Hz, 1H), 7.52 (ddd, *J* = 8.3, 7.2, 1.4 Hz, 1H), 7.38 (dt, *J* = 8.0, 0.9 Hz, 1H), 7.29 – 7.21 (m, 1H), 3.16 – 3.08 (m, 4H), 2.66 (t, *J* = 6.7 Hz, 4H), 2.10 (s, 6H), 2.02 (h, *J* = 6.4 Hz, 4H) ppm. **<sup>13</sup>C NMR** (101 MHz, CDCl<sub>3</sub>): δ 187.7, 147.1, 145.6, 137.0, 135.1, 132.3, 131.8, 127.1, 125.1, 124.0, 123.4, 118.7, 50.2, 25.4, 22.3, 17.3 ppm. **LCMS (ESI)**: *m/z* [M + H]<sup>+</sup> calcd for C<sub>23</sub>H<sub>24</sub>NOS<sup>+</sup> 362.2; found 362.1.

Figs. S2 and S3 show the measured NMR and LCMS spectra of the synthesized HTI-J compound.

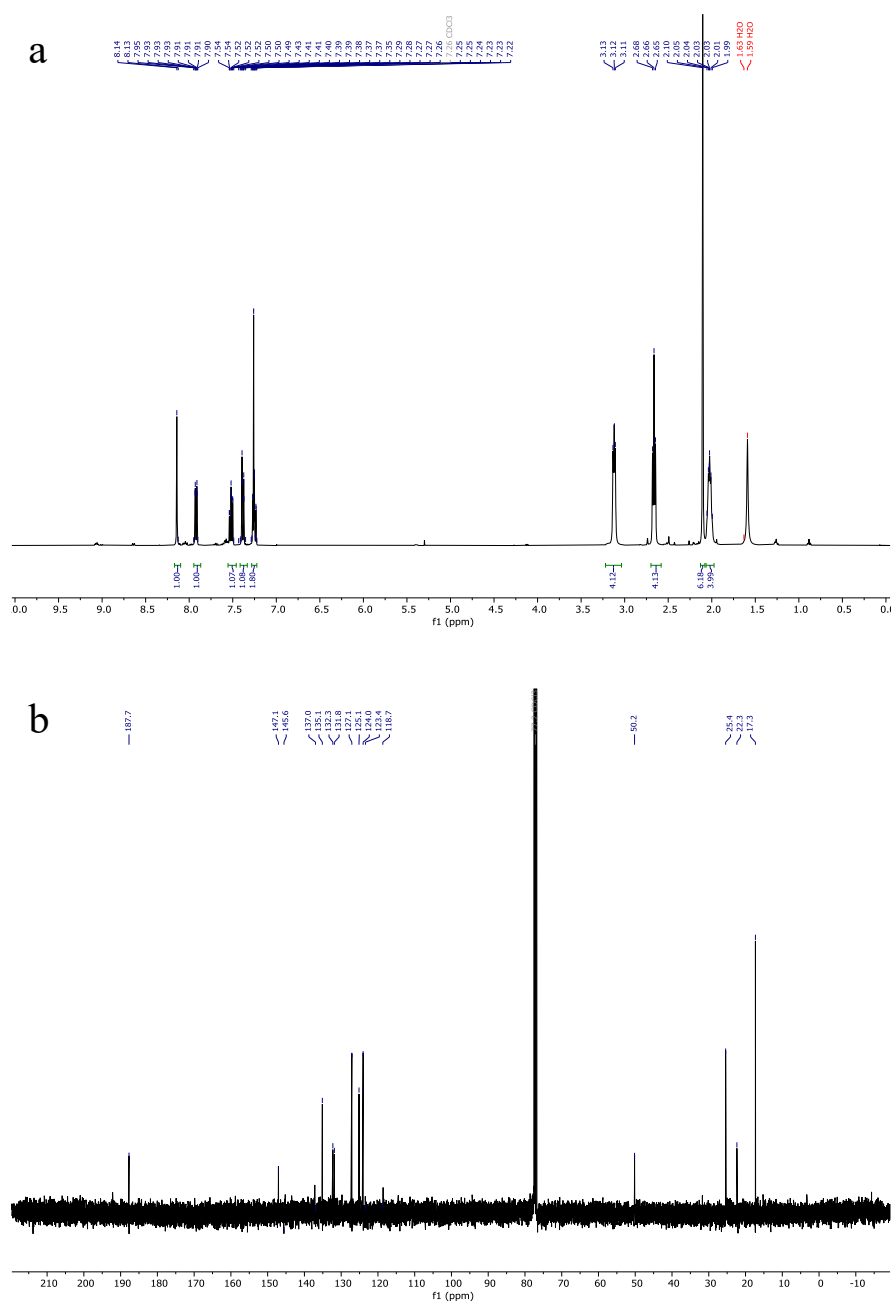

**Fig. S2**  $^1\text{H}$  (a) and  $^{13}\text{C}$  (b) NMR spectra of HTI-J (*Z*-isomer).





## 2 Stationary absorption spectrum of HTI-J in acetonitrile

Fig. S4 shows the normalized stationary absorption spectrum of HTI-J in acetonitrile (*Z*-isomer). The spectrum was recorded on a NanoDrop spectrophotometer using a drop from the 3 mM sample solution measured during the scattering experiments at SwissFEL. The spectrum is characterized by a broad absorption band from around 400 to 550 nm with a peak around 470 nm. During the scattering experiments, the sample solution was excited near the maximum at 470 nm. Optical transient absorption spectra were recorded with an excitation wavelength of 490 nm.

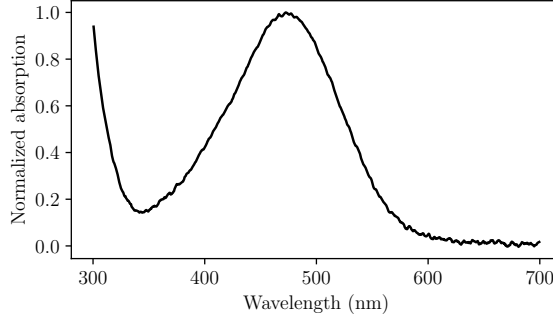

**Fig. S4** Normalized stationary absorption spectrum of HTI-J in acetonitrile (*Z*-isomer). During the scattering measurements, the sample solution was excited near the maximum at a wavelength of 470 nm. Optical transient absorption spectra were recorded with an excitation wavelength of 490 nm.

## 3 Optical transient absorption spectroscopy

The data handling and analysis of the transient absorption spectroscopy (TAS) data was performed within the KimoPack Python package (version 7.12.14), details on which have been published by Müller et al. [5]. Fig. S5a shows the average of 19 difference absorption spectra,  $\Delta A^{\text{raw}}$ , recorded from a sample solution of HTI-J in acetonitrile with a concentration of 0.3 mM. Transient absorption data were recorded with time delays up to 1 ns, but no signal was observed at time delays longer than the first  $\sim 10$  ps and the analysis was therefore constrained to a time range from -5 to 30 ps as shown in the displayed spectrum. The difference absorption spectrum before time zero is expected to be close to zero and to contain only random noise. A non-zero difference absorption for negative time delays, as can be clearly seen in S5a, indicates artifact contributions. Artifacts and background signals were removed by subtracting the average before time zero,  $\langle \Delta A^{\text{raw}} \rangle_{\Delta t < 0}$ , for each probe wavelength, resulting in the spectrum shown in Fig. S5b. Still, the data recorded at a probe wavelength below 530 nm appear noisy and are affected by the pump scatter around the excitation wavelength of 490 nm and were therefore masked prior to data analysis. The spectrum was further corrected for chirp and time zero and binned by a factor of two along

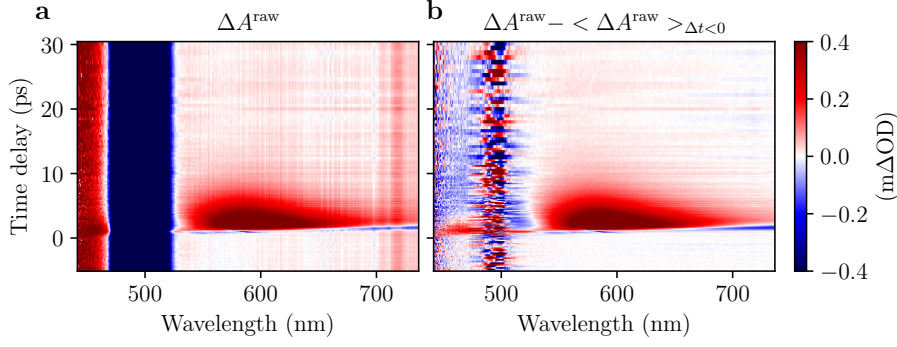

**Fig. S5** **a** Difference absorption data,  $\Delta A^{\text{raw}}$ , for HTI-J in acetonitrile excited at a laser wavelength of 490 nm and probed in the visible range from around 450 to 750 nm. The data recorded for wavelengths below around 530 nm are dominated by artifacts as can be seen by the non-zero difference absorption for negative time delays. **b** The mean before time zero,  $\langle \Delta A^{\text{raw}} \rangle_{\Delta t < 0}$ , is subtracted to remove background contributions, but the data recorded for wavelengths below 530 nm still appear noisy and affected by the pump scatter around 490 nm and are therefore not considered in the data analysis.

the wavelength axis. The resulting transient absorption spectrum as a function of the probe wavelength and the time delay is shown in Fig. S6a. The spectrum shows a

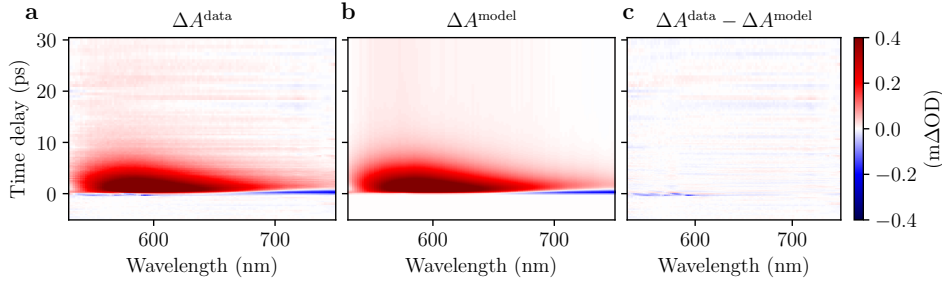

**Fig. S6** **a** Background subtracted, masked and chirp corrected difference absorption data,  $\Delta A^{\text{data}}$ , for HTI-J in acetonitrile. Following photoexcitation at a laser wavelength of 490 nm, a broad ESA band appears from around 540 to 690 nm that decays within  $\sim 10$  ps as well as a short-lived SE band that can be seen from around 670 to 750 nm. **b** Modeled difference absorption spectrum,  $\Delta A^{\text{model}}$ , resulting from global fitting with a kinetic model consisting of a sum of three exponential decay components and an offset component. **c** The model describes the data well as can be seen by the small residual. Some artifacts remain around time zero, in particular for wavelengths below 600 nm, that might arise from cross phase modulation [6, 7].

broad excited state absorption (ESA) band from around 540 to 690 nm that decays within  $\sim 10$  ps and a short-lived stimulated emission (SE) band that can be seen from around 670 to 750 nm, the red edge of the probed range. The transient absorption data were globally fitted with a kinetic model consisting of a sum of three exponential decay components convoluted with the instrument response function (IRF) and a constant

offset. Fig. S6b and c show the modeled spectrum and the residual, the difference between the data and the model. The model describes the data well as can be seen by the small residual (R-squared = 0.996). Some short-lived artifacts remain around time zero, in particular for wavelengths below 600 nm, which might arise from cross phase modulation [6, 7]. The best fit parameters, including lower and upper limits based on a 68% confidence interval, are compiled in Table S1. Fig. S7a and b show the

**Table S1** Characteristic times (in ps) resulting from the global modeling of the optical TAS data, including lower and upper limits based on a 68% confidence interval and the initial input.

| Parameter             | Value | Lower limit | Upper limit | Initial value |
|-----------------------|-------|-------------|-------------|---------------|
| $\tau_1^{\text{TAS}}$ | 0.5   | 0.4         | 0.7         | 0.5           |
| $\tau_2^{\text{TAS}}$ | 1.2   | 0.7         | 2.0         | 1.0           |
| $\tau_3^{\text{TAS}}$ | 2.6   | 2.0         | 3.0         | 2.5           |
| $t_0$                 | -0.12 | -0.15       | -0.12       | 0.00          |
| resolution            | 0.32  | 0.29        | 0.36        | 0.11          |

Lifetimes are interpreted as

$\tau_1$ : Decay of stimulated emission and structural and vibrational relaxation of the solute in the excited state.

$\tau_2$ : Structural and vibrational relaxation of the solute in the excited state.

$\tau_3$ : Internal conversion from the excited to the ground state (excited state lifetime).

concentration profiles and the decay-associated spectra (DAS) resulting from global fitting of the TAS data. In accordance with observations by Wiedbrauk et al. [3], the 0.5 ps and 1.2 ps components are attributed to decay of stimulated emission and structural and vibrational relaxation of the solute in the excited state, while the 2.6 ps component is interpreted as the lifetime of the excited state. The offset component likely accounts for a minor population of the *E* isomer through photoisomerization.

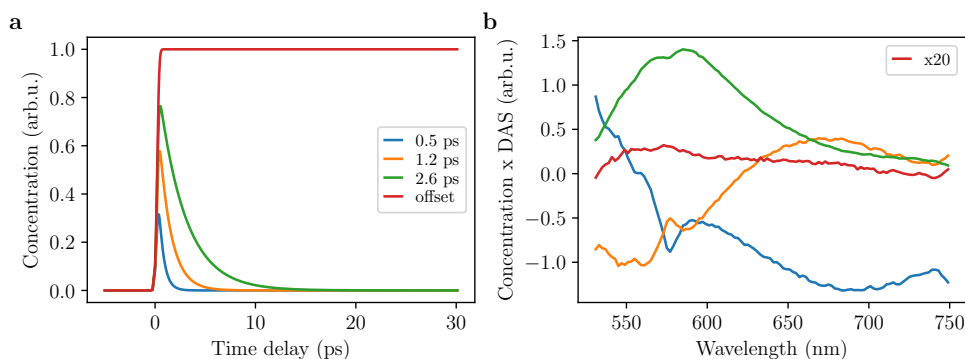

**Fig. S7** **a** Concentration profiles and **b** corresponding decay associated spectra (DAS) resulting from the global fitting of the femtosecond optical TAS data of HTI-J in acetonitrile. The spectra are attributed to stimulated emission and structural and vibrational relaxation of the solute in the excited state (0.5 ps and 1.2 ps), and the decay of the excited state (2.6 ps). The offset component likely accounts for a minor population of the *E* isomer through photoisomerization. The offset component has been scaled by a factor of 20 to enhance the visibility of the spectral features.

## 4 Time-resolved X-ray solution scattering

Time-resolved X-ray solution scattering (TR-XSS) measurements were carried out in 2022 at the Alvra endstation of the SwissFEL X-ray free electron laser under proposal number 20220249. HTI-J in acetonitrile was measured in two time ranges, -1.5 to 4.5 ps in 0.1 ps steps (short time scans, 21 scans recorded), and -10 to 60 ps in 1 ps steps (long time scans, 18 scans recorded). Each time step in a scan contains 1000 scattering images, resulting in 61000 images for each short-time scan and 71000 images for each long-time scan. The following supplementary notes contain further details on the experiment and the data reduction and processing required prior to data analysis.

### 4.1 Power titration

In order to select a laser pump power in the linear regime of the signal response, power titration scans were performed during the experiment. The scattering response of HTI-J in acetonitrile was recorded for laser powers ranging between 0.7 and 26  $\mu\text{J}$  with a fixed time delay of 20 ps. Fig. S8 shows the sum of the absolute of the azimuthally integrated difference scattering signal in a  $q$ -range between 1 and 3  $\text{\AA}^{-1}$ , which has been selected to reflect the response of the signal, as a function of the pump laser power. Apart from the data at the lowest laser power of 0.76  $\mu\text{J}$ , which appears to be an outlier, the intensity of the scattering signal shows an overall increase with higher laser powers. Data between 1 and 13  $\mu\text{J}$  have been modeled using a linear function. The linear fit was extrapolated to higher laser powers, which shows that the data obtained at laser powers greater than 15  $\mu\text{J}$  are outside of the linear regime. The scattering data of HTI-J in acetonitrile discussed in this study were recorded with a laser excitation power of 12  $\mu\text{J}$  per pulse to maximize the signal-to-noise ratio.

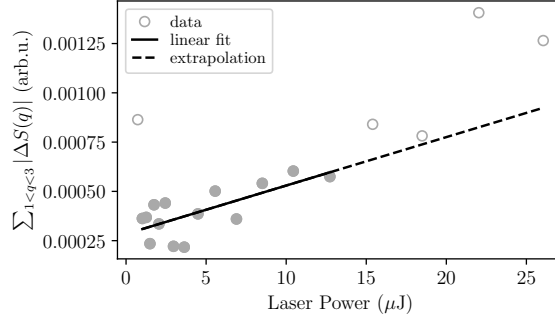

**Fig. S8** Response of the scattering signal, defined here as the sum of the absolute of the difference scattering signal in a  $q$ -range between 1 and 3  $\text{\AA}^{-1}$ , as a function of the pump laser power. The data at the lowest laser power of 0.76  $\mu\text{J}$  appears to be an outlier. Apart from this data point, the sum of the absolute of the difference scattering shows an upward trend with increasing laser power. Data between 1 and 13  $\mu\text{J}$  (filled markers) were modeled using a linear function. The extrapolation of the linear fit highlights that the signal response at higher laser powers is outside of the linear regime. The scattering data discussed in this study were recorded with a laser excitation power of 12  $\mu\text{J}$ .

## 4.2 Reduction of TR-XSS data

Following data acquisition, the detector pedestal, a background detector image acquired without exposure to radiation, was subtracted from each raw scattering image. The resulting image was then multiplied by the gain factors of the detector and re-binned (2x2 pixels) to reduce the size of the stored images. The loss of resolution through re-binning of the 16 Mpixel Jungfrau detector is acceptable for the recorded X-ray solution scattering images as the signals of interest display broad oscillating features. The stored 2D scattering images were corrected for the geometry of the experimental setup, i.e. the solid angle coverage of the detector, X-ray polarization [8], and absorption in the active layer of the detector. Additionally, defects, module borders, and shadows on the detector were masked out. Fig. S9a-d show the corrections and Fig. S9e shows an example of a corrected and masked detector image. Images deviating from the median measurement conditions were rejected based on missing information from the beamline diagnostics, an intensity filter, where images deviating more than 10% in summed absolute intensity from the median in each scan were rejected, and the correlation between the summed absolute scattering intensity and an I0 diode intensity monitor. The correlation filter was set to reject the lowest and highest 10% deviating from the linear regression fit for each time step in a scan. Examples for the outlier rejection are visualized in Fig. S10. The filtering resulted in a rejection of approximately 30% of the images.

The remaining images were integrated in 500 radial bins and 13 azimuthal bins to yield scattering signals,  $S(\Delta t, q, \phi)$  [8], depending on the time delay between pump and probe pulses,  $\Delta t$ , the magnitude of the scattering vector,  $q = (4\pi/\lambda) \sin(2\Theta/2)$ , where  $\lambda$  is the X-ray wavelength and  $2\Theta$  is the scattering angle, and the azimuthal angle  $\phi$ . Each scattering signal was normalized by the summed absolute intensity of itself in a  $q$ -range of 3 to 5.5  $\text{\AA}^{-1}$ :  $S_{\text{norm}}(\Delta t, q, \phi) = S(\Delta t, q, \phi) / \sum_{3 < q < 5.5} |S(\Delta t, q, \phi)|$ . Fig. S9f shows an example of a normalized scattering signal. The normalization range is

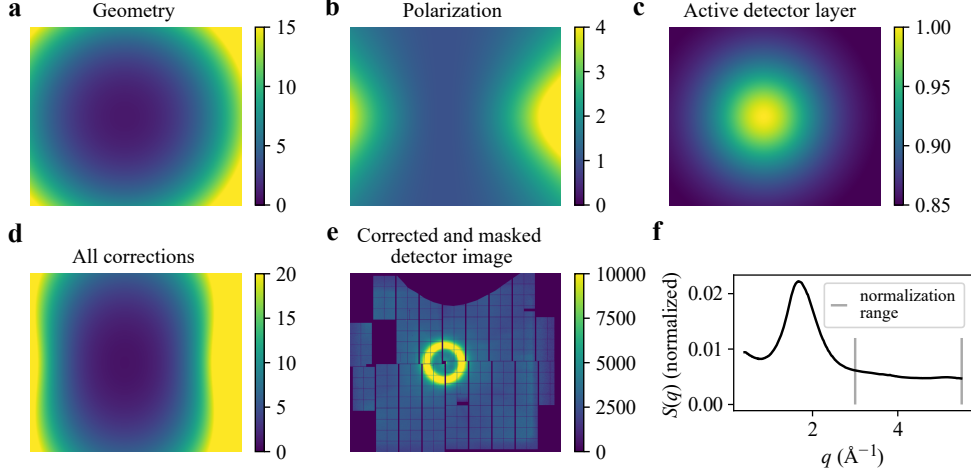

**Fig. S9** **a-c** Detector corrections applied to the recorded 2D scattering images. **d** Product of the detector corrections shown in **a-c**. **e** Corrected and masked example detector image for HTI-J in acetonitrile. **f** Azimuthal integration of the example image yields the scattering curve,  $S(q)$ . The signal is normalized by dividing  $S(q)$  by the sum of the absolute scattering intensity in the range  $3 < q < 5.5 \text{ \AA}^{-1}$ . The normalization range is indicated by vertical gray lines.

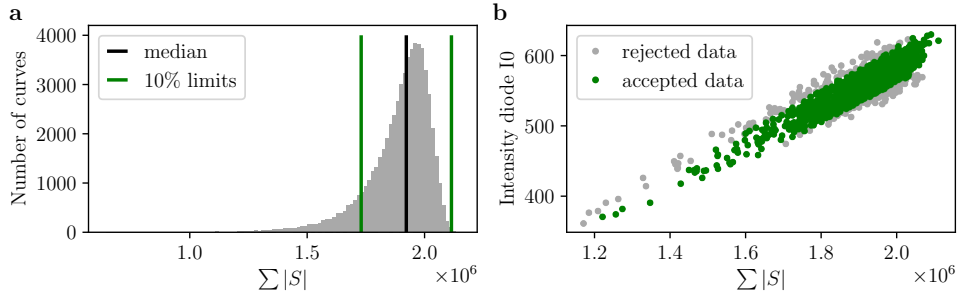

**Fig. S10** Detector images deviating from the median measurement condition were rejected based on **a** an intensity filter and **b** the correlation between an intensity diode and the summed absolute scattering signal. **a** Histogram of the sum of the absolute scattering signal in an example short time scan (total of 61000 measurements). Measurements deviating more than 10% from the median are rejected. **b** Intensity measured by the I0 intensity diode as a function of the summed absolute scattering signal for an arbitrary example time step (total of 1000 data points). The lowest and highest 10% of the signals deviating from a linear regression fit were rejected.

indicated by gray vertical lines. After normalization, the difference scattering signal  $\Delta S(\Delta t, q, \phi) = S_{\text{on}}(\Delta t, q, \phi) - S_{\text{off}}(q, \phi)$  was calculated by subtracting a weighted average of the three nearest neighbors without laser excitation (laser-off), where the signals were weighted by the time elapsed between the laser-off measurements to the respective laser-on measurement. The difference scattering signals of both the

short- and long-time scans were re-binned into equistatistical time bins based on the timing tool [9] information, averaged, and decomposed into isotropic and anisotropic signal contributions [10, 11]. Fig. S11a shows the isotropic,  $\Delta S_0(\Delta t, q)$ , and Fig. S11b the anisotropic,  $\Delta S_2(\Delta t, q)$ , difference scattering signal. This study focuses on the

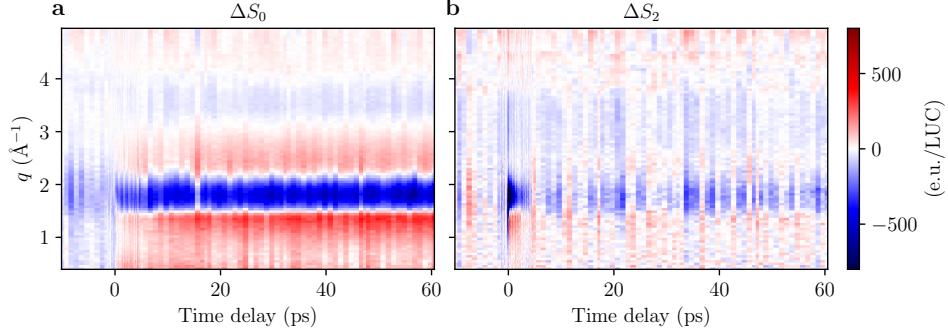

**Fig. S11** **a** Isotropic,  $\Delta S_0$ , and **b** anisotropic,  $\Delta S_2$ , difference scattering signal as a function of the time delay between laser pump and X-ray probe pulses and the magnitude of the scattering vector,  $q$ . Early time delays (-1.5 to 4.5 ps) were sampled in 100 fs steps and longer time delays (-10 to 60 ps) in 1 ps steps. **a** The isotropic difference scattering signal is dominated by heating of the bulk solvent, but contains also signal contributions reflecting solvation dynamics of HTI-J in acetonitrile as discussed in the main article. **b** The anisotropic signal contains the response to the optical Kerr effect (OKE), the photo-alignment of molecules by the electric field of the excitation laser [12]. The fast signal response to the OKE is used to correct time zero and determine the time resolution as described in Supplementary Note 4.3. The scattering signals are displayed in electron units per liquid unit cell (e.u./LUC); the scaling to this unit is described in Supplementary Note 4.4.

information contained in the isotropic difference scattering signal, which is referred to simply as  $\Delta S$  hereafter and in the main article. If the anisotropic difference scattering signal is shown or discussed, it is specified as  $\Delta S_2$ . To obtain a legible time delay axis, the time delays were shifted by 1048399.9 fs to correct for time zero with respect to the times recorded at the experiment and converted to picoseconds. Along the  $q$ -axis, discontinuities in the scattering signal caused by malfunctioning detector pixels that were not accounted for by the initial mask, were identified by visual inspection and subsequently masked. From the initial 500 radial bins, 387 bins remained which were further re-binned into 96 bins to increase the signal-to-noise ratio [13]. The resulting  $q$ -axis spans a range from 0.4 to 5  $\text{\AA}^{-1}$ .

### 4.3 Time zero and time resolution

Fig. S12a shows the anisotropic difference scattering signal,  $\Delta S_2$ , in a time delay range from -1.5 to 5 ps, which is dominated by the signal response to the optical Kerr effect (OKE). The anisotropic difference scattering signal captures the dynamics of re-orientational motion around the molecules photoaligned by the electric field of the excitation laser and is comprised of signal contributions from libration and orientational



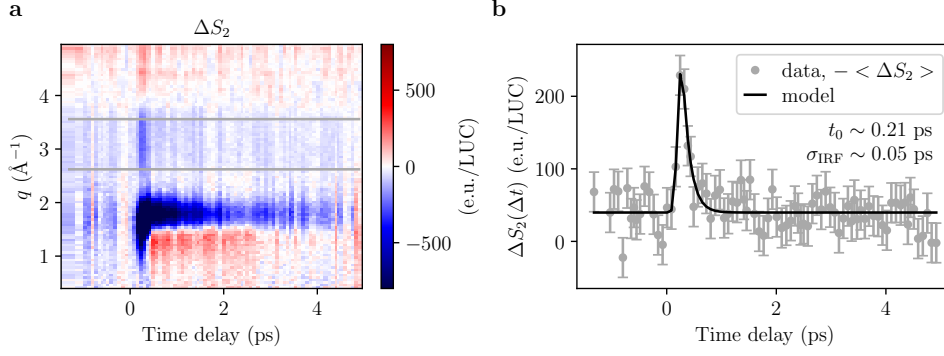

**Fig. S12** **a** Anisotropic difference scattering signal,  $\Delta S_2$ , at early time delays. The signal is dominated by the response to the optical Kerr effect, which captures the dynamics of re-orientational motion around the molecules photoaligned by the electric field of the excitation laser [12]. The horizontal lines at 2.6 and 3.6  $\text{\AA}^{-1}$  indicate the  $q$ -range in which  $\Delta S_2$  was averaged to model the signal response. **b** The average  $\Delta S_2$  ( $2.6 < q < 3.6 \text{ \AA}^{-1}$ ) was multiplied by -1 and modeled by a step-function rise and a single exponential decay convoluted with the instrument response function (IRF) and a constant offset (see eq. 13) to account for the non-zero background that can be seen at negative time delays. The time zero,  $t_0$ , and the Gaussian width of the IRF,  $\sigma_{\text{IRF}}$ , are extracted from the fit. The difference scattering signals are corrected for  $t_0$  and  $\sigma_{\text{IRF}}$  is used to fix this parameter in the global fitting.

diffusion as discussed by Ki et al. [12]. In the present study, the response to the OKE in the anisotropic difference scattering signal is used to correct time zero and model the instrument response function (IRF). For this,  $\Delta S_2$  was averaged in a  $q$ -range from 2.6 to 3.6  $\text{\AA}^{-1}$ , where  $\Delta S_2$  shows a short lived signal response, as shown in Fig. S12. The averaged data was multiplied by -1 to invert the signal response and modeled by a step-function rise and a single exponential decay convoluted with the IRF and a constant offset (see eq. 13). The offset is included to account for the non-zero background that can be seen for negative time delays. The modeling yields a time zero of around 0.21 ps, which was used to correct the difference scattering data presented in this study, and a Gaussian width of the IRF of  $\sigma_{\text{IRF}} \sim 0.05$  ps. Converted to full width at half maximum (FWHM), this corresponds to an IRF of approximately 120 fs. An estimate of the IRF from the experimental parameters given at the Alvrå endstation at SwissFEL yields a similar IRF of around 130 fs (FWHM), calculated using  $\text{IRF} \approx \sqrt{t_{\text{laser}}^2 + t_{\text{X-ray}}^2 + t_{\text{jet}}^2}$ , with a pulse width of the optical laser of  $t_{\text{laser}} \approx 50$  fs (FWHM), a pulse width of the X-rays of  $t_{\text{X-ray}} \approx 30$  fs (FWHM) and a temporal smearing due to the group velocity mismatch for the laser and X-ray pulses  $t_{\text{jet}} \approx 120$  fs.  $t_{\text{jet}}$  was calculated from the group velocity mismatch  $(n_{\text{laser}} - n_{\text{X-ray}})/c = 1.2 \text{ fs}/\mu\text{m}$ , where  $n$  is the refractive index ( $n_{\text{laser}} = 1.344$  [14] for the optical laser in acetonitrile and  $n_{\text{X-ray}} \sim 1$ ) and  $c$  is the speed of light. For a jet with a 100  $\mu\text{m}$  diameter, this results in  $t_{\text{jet}}$  of approximately 120 fs. Time jitter between the pump and probe pulses was corrected using the timing tool [9] and therefore neglected in the estimation of the IRF.

#### 4.4 Liquid unit cell scaling

To allow for quantitative data analysis, the intensity of the measured scattering signal was converted to electron units per liquid unit cell (e.u./LUC). The LUC is the smallest stoichiometrically representative unit and is constructed to include a single solute and  $N$  solvent molecules, where  $N$  depends on the concentration of the solution,  $c$ , and the density,  $\rho$ , and molar mass,  $M$ , of the solvent:

$$N = \frac{\rho}{M \cdot c} \quad (1)$$

For the measured solution of HTI-J in acetonitrile ( $c = 3$  mM,  $\rho = 786$  g/L [14],  $M = 41.05$  g/mol), the LUC includes around 6400 acetonitrile molecules.

Fig. S13a shows the scattering signals,  $S_{\text{acetonitrile}}$  and  $S_{\text{HTI-J}}$ , arising from scattering of the LUC. The scattering signal of liquid acetonitrile is a reference signal in

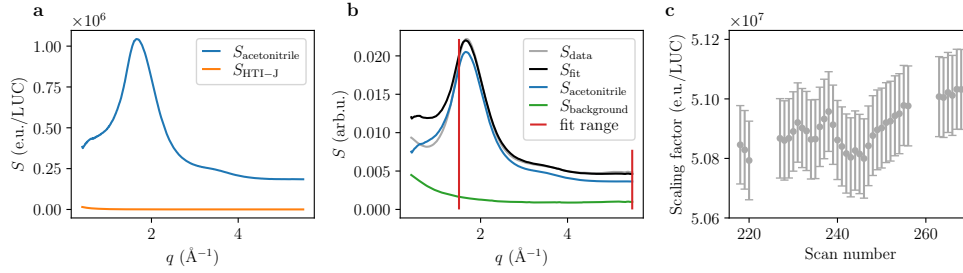

**Fig. S13** Conversion of the measured scattering intensity to electron units per liquid unit cell (e.u./LUC). **a** Scattering signal of liquid acetonitrile from [15] scaled by the number of solvent molecules per solute in the sample solution ( $\sim 6400$ ) and the scattering signal arising from coherent and incoherent scattering of a single HTI-J. As  $S_{\text{HTI-J}}$  is small compared to  $S_{\text{acetonitrile}}$ , it was neglected when fitting the experimental data. **b** Fitting of the measured data (median of laser-off curves, normalized),  $S_{\text{data}}$ , with  $S_{\text{acetonitrile}}$  and a background component,  $S_{\text{background}}$ , returns the fitted curve,  $S_{\text{fit}}$ . The fit was constrained to  $q > 1.5 \text{ \AA}^{-1}$  as the data and reference differ at low  $q$ , which impacted the quality of the fit. **c** Scaling factor and associated uncertainty (error bars) for scaling of the measured data to e.u./LUC as a function of the scan number.

e.u. per molecule taken from work by Kjær et al. [15] and was multiplied by  $N$ , while  $S_{\text{HTI-J}}$  is the sum of the coherent and incoherent (Compton) scattering of one HTI-J molecule. The coherent scattering was calculated via the Debye equation [16] from a ground state structure of HTI-J generated with density functional theory (DFT).  $S_{\text{HTI-J}}$  is small compared to  $S_{\text{acetonitrile}}$  and was therefore neglected when modeling the experimental data.

The scaling factor to convert the experimental data to units of e.u./LUC was determined for each scan separately by fitting the median of the normalized laser-off images in each scan with a linear combination of the scattering of  $N$  acetonitrile

molecules and a background component:

$$S_{\text{fit}}(q) = a \cdot S_{\text{acetonitrile}}(q) + b \cdot S_{\text{background}}(q). \quad (2)$$

The background scattering component was obtained from the median of azimuthally integrated detector images recorded without the sample solution in the path of the X-ray beam and is comprised of scattering of the helium gas that filled the sample chamber and stray scattering from upstream beamline components. Fig. S13b shows the fitting of the experimental scattering data,  $S_{\text{data}}$ , for an example scan (scan number 240). The fit range of  $q > 1.5 \text{ \AA}^{-1}$  was chosen as there is a discrepancy between the acetonitrile reference and the measured scattering data at lower  $q$  that affected the quality of the fit. In the fitted range, the data and fit agree well, but at low  $q$ , the fit exhibits higher intensity than the data, which could be due to residual background or air scattering in the acetonitrile reference. As part of the background scattering is absorbed in the jet, a measurement without the jet is also not a perfect representation of the background, which can lead to discrepancies in the fitting. Fig. S13c shows the scaling factor,  $1/a$ , as a function of the scan number of the data analyzed in this study. The scattering signals in each scan were scaled by the respective scaling factor.

#### 4.5 Identification of background artifact components

Artifacts in the scattering data were identified through singular value decomposition (SVD) of the difference scattering data at negative time delays [17]. SVD decomposes an  $M \times N$  matrix into orthogonal left and right singular vectors  $U_{i,i}$ ,  $V_{j,j}$ , weighted by singular values  $S_{i,j}$ , where  $i = 1..M$  and  $j = 1..N$  [18]. At negative time delays, laser-off images are subtracted from laser-off images and the difference signal should hence be flat and contain only random noise. Fig. S14a shows the isotropic difference scattering signal in a time range from -10 to 5 ps. The difference scattering signal before time zero is not flat as can, for example, be seen by the negative intensity around  $q = 1.8 \text{ \AA}^{-1}$ . The signal variation at negative time delays reveals the presence of artifacts that likely arise from fluctuations in the X-ray energy [19] and are expected to affect the scattering data at all time delays [17]. To identify the most prominent artifact contributions, an SVD of the difference scattering data in the time range  $-10 < \Delta t < -0.3 \text{ ps}$  (black vertical lines in Fig. S14a) was calculated. Fig. S14b shows the singular values, while the left and right singular vectors of the four strongest components are displayed in Fig. S14c and d. The left singular vectors (LSVs) contain the difference scattering profiles as a function of  $q$  and the right singular vectors (RSVs) the respective temporal information. The magnitude of the RSVs fluctuates in time, but none of them show a pronounced time-evolution. The difference scattering profiles show a noticeable  $q$ -dependence, but the magnitude of the components becomes small for  $i > 3$ . The difference scattering profile of the third LSV appears to be similar to a signal component in the difference scattering data, which carries the risk of removing real signal in a fit including this component [17]. For this reason, only the first two LSVs are included in the data modeling, meaning that the background artifact components,

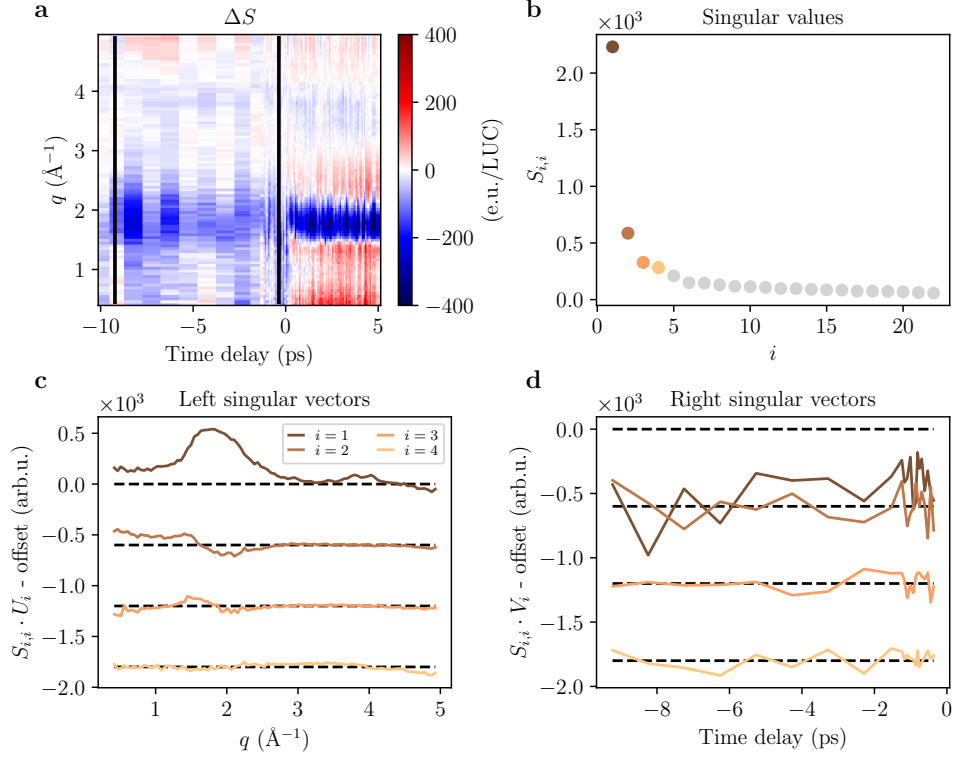

**Fig. S14** Identification of background artifact contributions to the isotropic difference scattering data,  $\Delta S$ . Before time zero,  $\Delta S$  is expected to be flat and contain only random noise. **a** The display of  $\Delta S$  in a time range from -10 to 5 ps shows that the difference before time zero varies with a noticeable  $q$ -dependence. The artifacts are expected to affect the data at all time delays [17]. The most prominent background artifact components are identified through SVD of the data in the time range  $-10 < \Delta t < -0.3$  ps (vertical black lines). **b** Singular values. **c**, **d** The left and right singular vectors of the four strongest components. The two strongest left singular vectors were included in the fitting of the scattering data.

$\Delta S^{\text{bkg}}(\Delta t, q)$ , are given by

$$\begin{aligned} \Delta S^{\text{bkg}}(\Delta t, q) &= a_1^{\text{bkg}}(\Delta t) \cdot S_{1,1} U_1(q) + a_2^{\text{bkg}}(\Delta t) \cdot S_{2,2} U_2(q) \\ &= a_1^{\text{bkg}}(\Delta t) \cdot \Delta S_1^{\text{bkg}}(q) + a_2^{\text{bkg}}(\Delta t) \cdot \Delta S_2^{\text{bkg}}(q) \end{aligned} \quad (3)$$

where  $a_1^{\text{bkg}}(\Delta t)$  and  $a_2^{\text{bkg}}(\Delta t)$  are amplitudes as a function of the time delay. Noise on the LSVs was smoothed using a Savitzky-Golay filter with a second order polynomial and an 11 points interval before including the components in the fitting.

## 4.6 Noise estimation

The noise level on the difference scattering signals was estimated based on a piecewise polynomial method as described by Dent et al. [20]. A third order polynomial was fit to a 16 points interval around each data point in the difference scattering signal. The difference between the data point and the polynomial is assigned as noise,  $N$ , and the standard deviation for each data point is calculated as  $\sigma = \sqrt{\frac{\sum_i N_i^2}{M}}$ , where  $M$  is the size of the interval. The estimation is repeated for all data points at all time delays.

## 5 Identification of signal components in the TR-XSS data

Signal components contributing to the isotropic difference scattering signal were identified through a stepwise analysis of the experimental data, which involved averaging of the difference signal and singular value decomposition (SVD).

### 5.1 Bulk solvent heating

Given the lifetime of the excited state of HTI-J in acetonitrile of  $2.6 \pm 0.5$  ps (see Supplementary Note 3), the low photoisomerization yield of HTI-J in polar solvents [3, 21], and vibrational cooling times reported between 10 and 15 ps for acetonitrile [22–24], it is assumed that the majority of the nonequilibrium ensemble of solute molecules returned to the initial ground state and re-established thermal equilibrium at the latest measured time delays, leaving only the change in scattering due to a temperature increase in the solvent [15]. The difference scattering signal arising from heating of the bulk solvent is therefore determined by averaging the isotropic difference scattering data,  $\Delta S$ , between 55 and 60 ps as indicated by the gray vertical lines in Fig. S15a. Fig. S15b shows the average difference scattering curve,  $\langle \Delta S \rangle_{\Delta t > 55 \text{ ps}}$  and the fit with a linear combination of a reference signal for bulk solvent heating [15] and the two background artifact components (see eq. 3):

$$\Delta S_{\text{fit}}(q) = a^{\text{ref}} \cdot \Delta S_{\Delta T}^{\text{ref}}(q) + a_1^{\text{bkg}} \cdot \Delta S_1^{\text{bkg}}(q) + a_2^{\text{bkg}} \cdot \Delta S_2^{\text{bkg}}(q). \quad (4)$$

The reference signal,  $\Delta S_{\Delta T}^{\text{ref}}(q)$ , was scaled to e.u./LUC/K by multiplying with the number of solvent molecules in one LUC (see Supplementary Note 4.4). As can be seen in Fig. S15b, the data and fitting curve differ at low  $q$ , which might be due to unaccounted artifacts in either the measured data or the reference. As a consequence, the fit was constrained to  $q > 1.2 \text{ \AA}^{-1}$  to optimize the agreement between the data and fit function at the peaks around  $1.4$  and  $2.4 \text{ \AA}^{-1}$  and at the negative feature around  $1.8 \text{ \AA}^{-1}$ . The fit returned the parameters  $a^{\text{ref}} = 1.24 \pm 0.02$ ,  $a_1^{\text{bkg}} = -0.13 \pm 0.01$ , and  $a_2^{\text{bkg}} = 0.35 \pm 0.08$ . The signal attributed to arise from heating of the bulk solvent,  $\Delta S_{\Delta T}$  in e.u./LUC/K, is calculated by subtracting the background artifact contributions and scaling the curve by  $1/a^{\text{ref}}$ :

$$\Delta S_{\Delta T}(q) = \frac{1}{a^{\text{ref}}} \left( \langle \Delta S \rangle_{\Delta t > 55 \text{ ps}}(q) - a_1^{\text{bkg}} \Delta S_1^{\text{bkg}}(q) - a_2^{\text{bkg}} \Delta S_2^{\text{bkg}}(q) \right). \quad (5)$$

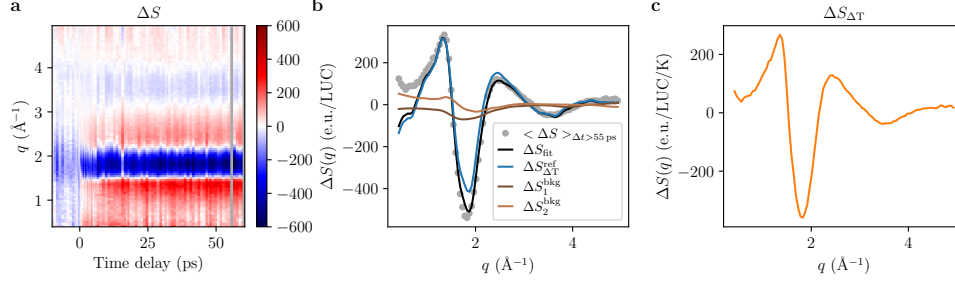

**Fig. S15** **a** The isotropic difference scattering data between 55 and 60 ps is averaged to determine the signal contribution arising from heating of the bulk solvent. The vertical gray lines indicate the averaged time delays. **b** The average curve is fitted with a linear combination of a reference for bulk solvent heating [15], which was multiplied by the number of solvent molecules in the LUC, and two background artifact components. Due to a discrepancy between the measured data and the reference at low  $q$ , the fit was constrained to  $q > 1.2 \text{ \AA}^{-1}$ . **c**  $\Delta S_{\Delta T}$  used for subsequent data analysis was calculated by subtracting the background artifact components from the averaged data and scaling the curve to e.u./LUC/K.

Fig. S15c shows the resulting  $\Delta S_{\Delta T}$ , which was used in the subsequent data analysis. The shape of  $\Delta S_{\Delta T}$  is fully constrained during the global fitting and not optimized.

## 5.2 Vibrational relaxation of the solute

Fig. S16a shows the residual after fitting the isotropic difference scattering data with the signal response to bulk solvent heating and the two background artifact components:

$$\Delta S_{\text{fit}}(\Delta t, q) = \Delta T(\Delta t) \cdot \Delta S_{\Delta T}(q) + \Delta S^{\text{bkg}}(\Delta t, q), \quad (6)$$

with  $\Delta T(\Delta t)$  described by the kinetic function given in eq. 11,  $\Delta S_{\Delta T}(q)$  as shown in Fig. S15c, and  $\Delta S^{\text{bkg}}(\Delta t, q)$  as specified in eq. 3. The residual contains a signal with a negative feature around  $q = 1.5 \text{ \AA}^{-1}$  and positive features around  $q = 2 \text{ \AA}^{-1}$  and below  $q = 1 \text{ \AA}^{-1}$  that persists for up to 40 ps and which can neither be explained by the signal response to the optical Kerr effect, for which a lifetime of  $0.35 \pm 0.21$  ps has previously been reported [12], nor by excited state structural rearrangements in the solute and solvation shell, as the analysis of the TAS data revealed an excited state lifetime of  $2.6 \pm 0.5$  ps for HTI-J in acetonitrile (see Supplementary Note 3). To isolate the long-lived signal from the signal response to the OKE and the excited state dynamics of HTI-J, an SVD of the residual in a time delay range between 10 and 25 ps (see vertical black lines in Fig. S16a) was calculated. After 10 ps, the signal response to the OKE is essentially fully decayed and more than 96% of the solute molecules have returned to the ground state, meaning that the signal contribution from excited state dynamics in HTI-J is expected to be negligible. Fig. S16b shows the four strongest left singular vectors (LSVs). The  $q$ -profile of the first LSV matches the features observed for the long-lived signal in the residual difference scattering data. Fig. S16c shows the first LSV after smoothing the noise using a Savitzky-Golay filter with an 11 point window and a second-order polynomial. This curve was used as the initial signal component for

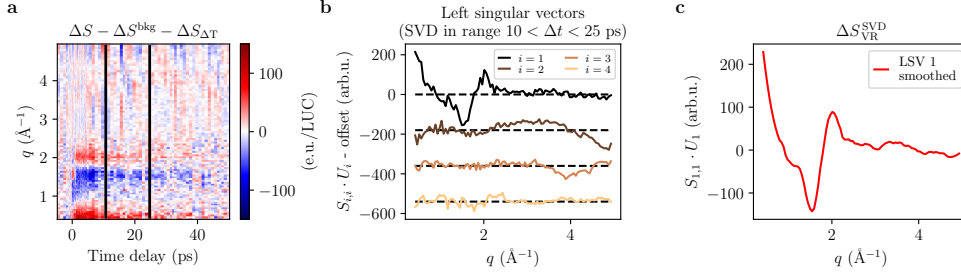

**Fig. S16** **a** Residual difference scattering after fitting with an incomplete model considering two background artifact components and bulk solvent heating. The residual contains a signal component that appears for up to 40 ps and cannot be attributed to the optical Kerr effect [12] or structural changes of the excited state solute. An SVD of the residual in a time range of  $10 < \Delta t < 25$  ps was calculated to extract a  $q$ -profile for this component. **b** The four strongest left singular vectors (LSVs). The profile of the first LSV matches the signal observed in the residual. LSVs 2 and 3 contain artifacts at low- and high- $q$ . **c** The first LSV was smoothed using a Savitzky-Golay filter with an 11 point interval and a second order polynomial to reduce the noise on the curve.

the scattering response to vibrational relaxation of HTI-J in acetonitrile and denoted  $\Delta S_{VR}^{SVD}$ . The superscript SVD was added to distinguish this component from  $\Delta S_{VR}$  shown in Fig. 5 in the main article, which is the optimized signal after global fitting (see Supplementary Note 6). The assignment of this component to solvent rearrangements due to vibrational relaxation of HTI-J in acetonitrile is discussed in the main article.

In addition to the first LSV, which was assigned as a signal component, the second and third LSVs also contain noticeable intensity features, in particular towards higher  $q$ . These features likely are remnant artifacts in the data, and are most evident by the fluctuating intensity features in the residual difference scattering signal in Fig. S16a at high  $q$ . Since the signals investigated in this study are small, the presence of artifacts can affect the data modeling significantly. To minimize the influence of artifacts, a range of  $0.6 < q < 3.8 \text{ \AA}^{-1}$  was chosen for the subsequent data analysis.

### 5.3 Optical Kerr effect

Fig. S17a shows the residual after fitting the isotropic difference scattering data with the signal response to bulk solvent heating, the signal attributed to vibrational relaxation, and the two background artifact components:

$$\Delta S_{\text{fit}}(\Delta t, q) = \Delta T(\Delta t) \cdot \Delta S_{\Delta T}(q) + \gamma(\Delta t) \cdot \Delta S_{VR}^{SVD}(q) + \Delta S^{\text{bkg}}(\Delta t, q), \quad (7)$$

with  $\Delta T(\Delta t)$  and  $\gamma(\Delta t)$  described by the kinetic function given in eq. 11 and 12,  $\Delta S_{\Delta T}(q)$  and  $\Delta S_{VR}^{SVD}(q)$  as shown in Fig. S15c and Fig. S16c, and  $\Delta S^{\text{bkg}}(\Delta t, q)$  as specified in eq. 3. The residual is shown in a time range from -1 to 10 ps to highlight the remaining signal response at early time delays. Fig. S17c and d show the four strongest left and right singular vectors resulting from an SVD of the displayed data. Based on a qualitative comparison of the shape of the first LSV and the response time in the first RSV to the results reported by Ki et al. [12], the first LSV is assigned to the signal

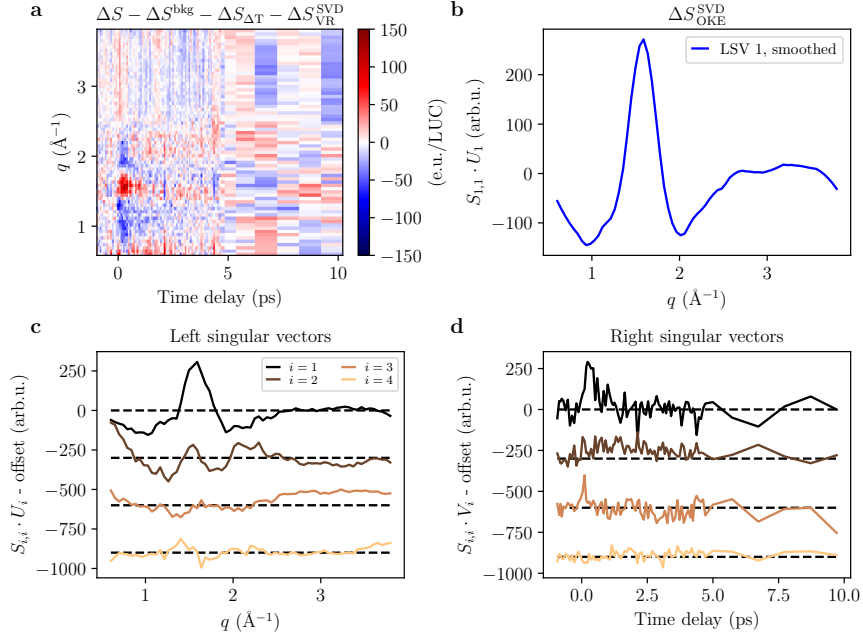

**Fig. S17** **a** Residual difference scattering after fitting with an incomplete model considering two background artifact components and the signal response to bulk solvent heating and vibrational relaxation. The residual is shown in a time range from -1 to 10 ps to highlight the signal response at early time delays. **c** and **d** show the four strongest LSVs and RSVs resulting from an SVD of the displayed data. **b** The first LSV is assigned to the signal response to the optical Kerr effect based on comparison of the signal shape and the response time captured by the first RSV to results reported by Ki et al. [12]. The noise on the first LSV was smoothed using a Savitzky-Golay filter with an 11 point interval and a second order polynomial.

response to the optical Kerr effect. Fig. S17b shows the first LSV after smoothing the noise using a Savitzky-Golay filter with an 11 point interval and a second order polynomial. The component is denoted  $\Delta S_{\text{OKE}}^{\text{SVD}}$ , where the superscript SVD was added to distinguish the component from  $\Delta S_{\text{OKE}}$  shown in Fig. 5 in the main article, which is the optimized signal after global fitting (see Supplementary Note 6).

The second and third RSV also display a time-dependence. The fast response in the third RSV around time zero suggests that this component might be part of the signal response to the optical Kerr effect. The second RSV shows a slower rise around time zero and a decay on a picosecond time scale, which is reminiscent of the excited state lifetime of  $2.6 \pm 0.5$  ps of HTI-J in acetonitrile obtained from the analysis of the TAS data (see Supplementary Note 3). The second SVD component is further discussed in Supplementary Note 5.4.

## 5.4 Solute and solvation shell structural rearrangement

In Fig. S17, it can be seen that the second RSV after SVD of the residual after fitting with an incomplete model consisting of two background artifact components and



the signal response to bulk solvent heating and vibrational relaxation shows a time-dependence with a rise around time zero and a decay within a few picoseconds. The response time of this component resembles the excited state lifetime of  $2.6 \pm 0.5$  ps of HTI-J in acetonitrile obtained from the analysis of the TAS data (see Supplementary Note 3). Fig. S18 shows the second LSV compared to difference scattering signals calculated from molecular dynamics (MD) simulations (see Supplementary Notes 9 and 10.1). The shape of the simulated signal for a twisting of the solute and a response

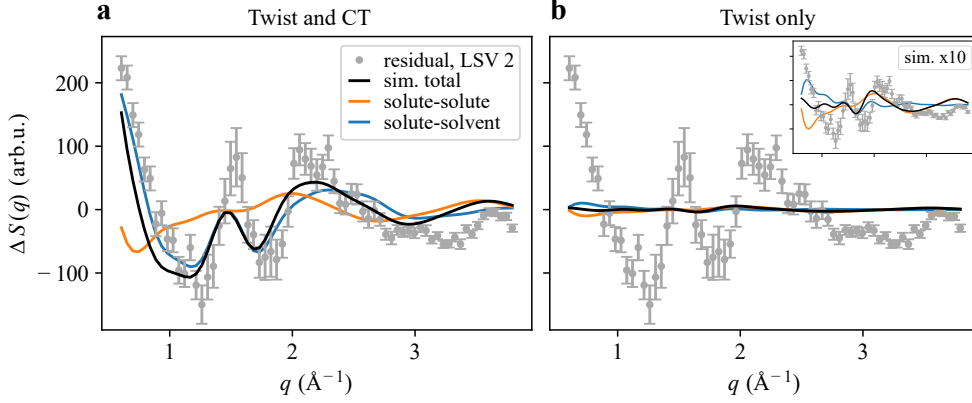

**Fig. S18** Second SVD component (LSV 2) of the residual after fitting with an incomplete model (see Fig. S17) compared to the difference scattering signal predicted from MD simulations (see Supplementary Notes 9 and 10.1). The black sim. total curve is the sum of the signals calculated from solute-solute (orange) and solute-solvent (blue) radial distribution functions (RDFs). **a** The simulated signal for a geometric rearrangement of the solute and a response of the solvation shell to intramolecular charge transfer (“Twist and CT”) matches the shape of the residual LSV 2. **b** The simulated signal for only a geometric rearrangement of the solute without charge transfer (“Twist only”) does not agree with the data. The inset shows the simulated curves multiplied by a factor of 10 to enhance the visibility of the mismatch between simulation and data, which is especially clear for  $q < 1.5 \text{ \AA}^{-1}$ , where the contribution of the changes in the solvent shell is most significant.

of the solvation shell to intramolecular charge transfer (“Twist and CT”) agrees with the second LSV, while the simulated signal for only a geometric rearrangement of the solute without a charge transfer (“Twist only”) does not fit the data. The inset in Fig. S18b shows the simulated signals multiplied by a factor of 10 to emphasize the difference, in particular for  $q < 1.5 \text{ \AA}^{-1}$ , where the contribution of the changes in the solvent shell has the greatest impact.

While the observation of this component in the residual after fitting with an incomplete model strongly supports the presence of a signal arising from solute and solvation shell structural rearrangements in response to population of an intermolecular charge transfer excited state, the LSV differs somewhat from the simulated signal at  $q \sim 1.7 \text{ \AA}^{-1}$  and for  $q > 3 \text{ \AA}^{-1}$ . The  $1.7 \text{ \AA}^{-1}$  feature matches with the peak position of the component assigned to the signal response to the optical Kerr effect (see Fig. S17b) and can be explained by the components not being well-separated in the

singular vectors. The deviation at high- $q$  is attributed to artifacts in the data. A more accurate estimate of the solute and solvation shell structural rearrangement (SSR) component,  $\Delta S_{\text{SSR}}$ , is obtained in the global fitting presented in the next sections using the simulated signal as initial guess.

## 6 Global fitting of the TR-XSS data

The data analysis of the time-resolved X-ray scattering data is inspired by the global fitting strategies commonly employed in the analysis of transient spectroscopic data [5, 25]. Algorithm 1 summarizes the global fitting approach applied to the TR-XSS data, using the fit function

$$\Delta \mathbf{S}^{\text{fit}} = \Delta \mathbf{S}^{\text{model}} + \Delta \mathbf{S}^{\text{bkg}} = \mathbf{A} \cdot \mathbf{C} + \mathbf{B} \cdot \mathbf{D} \quad (8)$$

in matrix form (see also eqs. 1 and 2 in the main article).

---

### Algorithm 1 Global fitting of time-resolved X-ray scattering data

---

**Input:**

$M \times N$  matrix  $\Delta \mathbf{S}^{\text{data}}$  of time-dependent difference scattering data

**Initialize:**

$M \times K$  matrix  $\mathbf{A}_0$  of  $K$  initial kinetic profiles depending on parameters  $\{a_i\}, \{\tau_i\}$

$K \times N$  matrix  $\mathbf{C}_0$  of  $K$  initial signal  $q$ -profiles

$K \times K$  diagonal matrix  $\mathbf{W}$  of regularization parameters

$M \times L$  matrix  $\mathbf{B}_0$  of  $L$  initial background artifact components amplitudes

$L \times N$  matrix  $\mathbf{D}$  of  $L$  background artifact components

Noise estimate  $\sigma$

$\mathbf{A} \leftarrow \mathbf{A}_0, \mathbf{B} \leftarrow \mathbf{B}_0$

**repeat**

**Update A**

$\triangleright$  Outer loop kinetic profiles

**Optimize B**

$\triangleright$  Inner loop background amplitudes

            Fit  $\Delta \mathbf{S}^{\text{data}} - \mathbf{A} \cdot \mathbf{C}_0$  with  $\Delta \mathbf{S}^{\text{bkg}}$  for each time delay independently

**until**  $\left\| \frac{\Delta \mathbf{S}^{\text{data}} - \mathbf{A} \cdot \mathbf{C}_0 - \mathbf{B} \cdot \mathbf{D}}{\sigma} \right\|^2$  is minimized to within desired tolerance

$\mathbf{C} \leftarrow \mathbf{C}_0$

**Optimize C**

$\triangleright$  Optimize  $q$ -profiles

Solve  $\min_{\mathbf{C}} \{ \|\Delta \mathbf{S}^{\text{data}} - \mathbf{A} \cdot \mathbf{C} - \mathbf{B} \cdot \mathbf{D}\|^2 + \|\mathbf{W} \cdot (\mathbf{C} - \mathbf{C}_0)\|^2 \}$

**Optimize A**

$\triangleright$  Optimize kinetic profiles

Solve  $\min_{\mathbf{A}} \left\| \frac{\Delta \mathbf{S}^{\text{data}} - \mathbf{A} \cdot \mathbf{C} - \mathbf{B} \cdot \mathbf{D}}{\sigma} \right\|^2$

**Output:** Optimized  $\mathbf{A}$ ,  $\mathbf{C}$ , and  $\mathbf{B}$

---

The parameters for the initial kinetic profiles, contained in  $\mathbf{A}_0$ , are reported in Table S2 and the kinetic functions are described in Supplementary Note 7. The initial  $q$ -profiles, contained in  $\mathbf{C}_0$ , are given by the signal components determined from the experimental data as described in Supplementary Note 5:  $\Delta S_{\Delta T}$ ,  $\Delta S_{\text{VR}}^{\text{SVD}}$ ,  $\Delta S_{\text{OKE}}^{\text{SVD}}$ , as well as the simulated difference scattering signal for solute and solvation shell structural rearrangements (see Supplementary Note 10.1). The fitting uses regularization as explained in Supplementary Note 6.1, where also the regularization parameters are specified. The determination of the two background profiles in  $\mathbf{D}$  is described in Supplementary Note 4.5.

In the algorithm,  $\mathbf{A}$ ,  $\mathbf{B}$ , and  $\mathbf{C}$  are optimized to minimize the square of the residual between the data and the fit function, while  $\mathbf{D}$ , containing the background profiles, is kept constant. The optimized kinetic parameters are summarized in Table S2 and the corresponding kinetic functions are shown in Fig. S20, while the optimized  $q$ -profiles are shown in Fig. 5 in the main article.  $\Delta S_{\Delta T}$  was fully constrained and not optimized.

## 6.1 Regularization

The optimization of  $\mathbf{C}$  ( $q$ -profiles) is performed by solving a regularized least squares problem, where the objective is:

$$\min_{\mathbf{C}} \{ \|\Delta \mathbf{S}' - \mathbf{A} \cdot \mathbf{C}\|^2 + \|\mathbf{W} \cdot (\mathbf{C} - \mathbf{C}_0)\|^2 \}. \quad (9)$$

Here,  $\Delta \mathbf{S}' = \Delta \mathbf{S}^{\text{data}} - \mathbf{B} \cdot \mathbf{D}$  is the background subtracted data,  $\mathbf{C}_0$  is the matrix of initial  $q$ -profiles, and  $\mathbf{W}$  is a diagonal matrix with the square roots of the regularization parameters,  $\sqrt{\lambda_k}$ , on the diagonal:

$$\mathbf{W} = \begin{pmatrix} \sqrt{\lambda_1} & 0 & \cdots & 0 \\ 0 & \sqrt{\lambda_2} & \cdots & 0 \\ \vdots & \vdots & \ddots & \vdots \\ 0 & 0 & \cdots & \sqrt{\lambda_K} \end{pmatrix}. \quad (10)$$

For the global fitting of the HTI-J in acetonitrile TR-XSS data, the  $q$ -profile for the bulk solvent heating was fully constrained by setting  $\lambda_{\Delta T} = 10$ . The remaining signal components were constrained by  $\lambda_{\text{VR}} = \lambda_{\text{OKE}} = \lambda_{\text{SSR}} = 0.02$  determined through the L-curve method [26, 27]. Fig. S19 shows the solution norm,  $\|\mathbf{C} - \mathbf{C}_0\|$ , as a function of the residual norm,  $\|\Delta \mathbf{S}' - \mathbf{A} \cdot \mathbf{C}\|$ , for regularization parameters  $\lambda_{\text{VR}} = \lambda_{\text{OKE}} = \lambda_{\text{SSR}}$  between 0.001 and 0.1. A flat corner can be seen around 0.02, which was chosen as regularization parameter.

## 6.2 Global fitting results

Table S2 summarizes the parameters obtained from the global fitting of the TR-XSS data. The optimized kinetic profiles are visualized in Fig. S20. The time constants are also reported in Table 1 of the main article, where they are discussed and interpreted in detail. The amplitude of the  $\Delta S_{\text{SSR}}$  component,  $a_{\text{SSR}}$ , was limited to an upper value of 1 to ensure the stability of the global fitting.

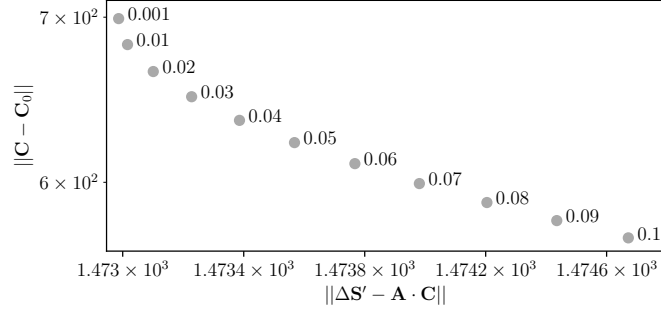

**Fig. S19** The L-curve method was used to select regularization parameters for the optimization of the  $q$ -profiles. The solution norm as a function of the residual norm for regularization parameters  $\lambda_{\text{VR}} = \lambda_{\text{OKE}} = \lambda_{\text{SSR}}$  between 0.001 and 0.1 shows a flat corner around 0.02. The labels represent the regularization parameter of each data point.  $\Delta S_{\Delta T}$  was completely constrained by setting  $\lambda_{\Delta T} = 10$ . The initial signal for  $\Delta S_{\text{SSR}}$  was the simulated curve “Twist and CT” shown in Fig. S26a.

**Table S2** Parameters obtained from a global fitting of the model given in eq. 2 in the main article to the time-resolved isotropic difference scattering signal of the HTI-J molecule photoexcited in acetonitrile. Times are in ps.

| Parameter             | Value           | Initial value | Origin                                              |
|-----------------------|-----------------|---------------|-----------------------------------------------------|
| $a_{\text{OKE}}$      | $0.6 \pm 0.1$   | 0.5           | Signal response to optical Kerr effect              |
| $\tau_{\text{OKE}}$   | $0.4 \pm 0.1$   | 0.4           |                                                     |
| $a_{\text{SSR}}$      | $0.4 \pm 0.2$   | 0.5           | Solute and solvation shell structural rearrangement |
| $\tau_{\text{SSR}}^1$ | $0.5 \pm 0.2$   | 0.3           |                                                     |
| $\tau_{\text{SSR}}^2$ | $3 \pm 1$       | 2.6           |                                                     |
| $a_{\text{VR}}$       | $0.7 \pm 0.1$   | 0.5           | Solute vibrational relaxation                       |
| $\tau_{\text{VR}}^1$  | $1.9 \pm 0.4$   | 2             |                                                     |
| $\tau_{\text{VR}}^2$  | $16 \pm 2$      | 14            |                                                     |
| $a_{\Delta T}^1$      | $0.33 \pm 0.01$ | 0.3           | Fast solvent heating                                |
| $\tau_{\Delta T}^1$   | $0.2 \pm 0.1$   | 1             |                                                     |
| $a_{\Delta T}^2$      | $0.89 \pm 0.01$ | 0.9           | Slow solvent heating                                |
| $\tau_{\Delta T}^2$   | $13.7 \pm 0.5$  | 14            |                                                     |

The results presented in the main article and in Table S2 are obtained using the simulated signal for twisting and intramolecular charge transfer of the solute (“Twist and CT”, see Fig. S26a) as initial guess for the  $\Delta S_{\text{SSR}}$  component in the global fitting. The global fitting yields similar results when using the simulated difference signal for intramolecular charge transfer without twisting (“CT only”, see Fig. S26b). Fig. S21 shows the optimized  $\Delta S_{\text{SSR}}$  with “CT only” as initial guess. The optimized curve matches similarly well to the “CT only” and “Twist and CT” simulated curves showing that  $\Delta S_{\text{SSR}}$  is dominated by the solvent shell response to the intramolecular charge transfer and not the twisting of the solute. Some differences can be seen above  $2 \text{ \AA}^{-1}$ . The peak around  $2.2 \text{ \AA}^{-1}$  in the “CT only” solute-solvent simulated signal shifts

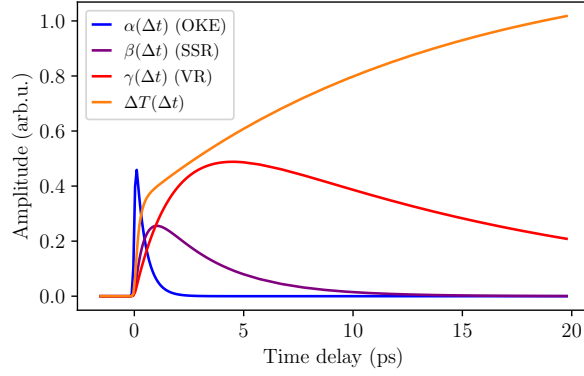

**Fig. S20** Kinetic profiles resulting from global fitting of the time-resolved X-ray scattering data with the kinetic functions described in Supplementary Note 7.

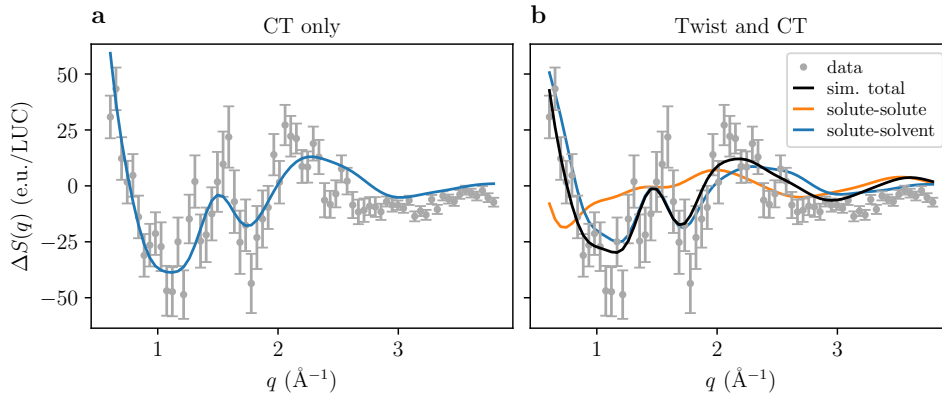

**Fig. S21**  $\Delta S_{\text{SSR}}$  after global fitting with the simulated “CT only” signal as initial guess compared to simulated signals (see Supplementary Note 10.1). The black sim. total curve is the sum of the signals calculated from solute-solute (orange) and solute-solvent (blue) radial distribution functions. For “CT only”, the sim. total is the solute-solvent signal. The optimization of the  $q$ -profiles was regularized similarly as in the case of using “Twist and CT” as initial guess ( $\lambda_{\Delta T} = 10$ ,  $\lambda_{\text{VR}} = \lambda_{\text{OKE}} = \lambda_{\text{SSR}} = 0.02$ ).

slightly to lower  $q$  and around  $3.6 \text{ \AA}^{-1}$ , the optimized data shows a slight peak. Both these features can be explained by contribution of the simulated solute-solute signal as can be seen in Fig. S21b.

In case of a sole twist of the solute without the intramolecular charge transfer (“Twist only”, see Fig. S26c), the optimized  $\Delta S_{\text{SSR}}$  changes towards the solute-solvent simulated signal in response to intramolecular charge transfer as can be seen in Fig. S22. Fig. S22a compares  $\Delta S_{\text{SSR}}$  to the simulated signals for twisting of the solute without charge transfer. While the shape of the signals agrees at high  $q$ , the change in the signal at low  $q$ , where the solute-solvent term strongly impacts the signal shape,

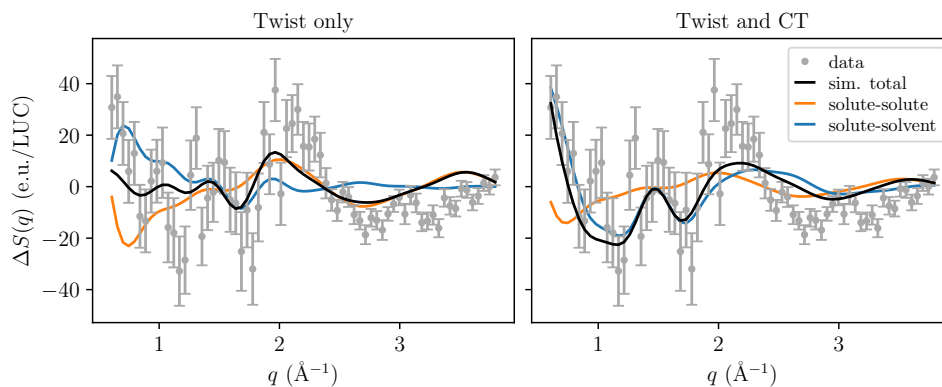

**Fig. S22**  $\Delta S_{\text{SSR}}$  after global fitting with the simulated “Twist only” signal as initial guess compared to simulated signals (see Supplementary Note 10.1). The black sim. total curve is the sum of the signals calculated from solute-solute (orange) and solute-solvent (blue) radial distribution functions. When using the “Twist only” sim. total as initial guess, the optimized  $\Delta S_{\text{SSR}}$  adapts towards the simulated signal including a rearrangement of the solvent shell in response to intramolecular charge transfer (“Twist and CT”). The optimization of the  $q$ -profiles was regularized similarly as in the case of using “Twist and CT” as initial guess ( $\lambda_{\Delta T} = 10$ ,  $\lambda_{\text{VR}} = \lambda_{\text{OKE}} = \lambda_{\text{SSR}} = 0.02$ ).

matches better with the simulated signal including intramolecular charge transfer as can be seen in Fig. S22b.

## 7 Kinetic functions

The temporal evolution of the signal components in the time-resolved X-ray solution scattering data is modeled by kinetic functions consisting of rising and decaying exponential functions convoluted with the instrument response function (IRF) of the experiment. In the present case, the functions depend on the time delay,  $\Delta t$ , and are parametrized by the time of signal onset,  $t_0$ , the Gaussian width of the IRF,  $\sigma_{\text{IRF}}$ , time constants,  $\tau_i$ , and amplitudes,  $a_i$ . Time zero and the Gaussian width of the IRF were determined by modeling the signal response to the optical Kerr effect in the anisotropic difference scattering data by eq. 13 as explained in Supplementary Note 4.3. These parameters were then fixed to  $t_0 = 0$  ps and  $\sigma_{\text{IRF}} = 0.05$  ps when modeling the experimental data with eqs. 11, 12 and 13. Time zero is set to 0 as the time axis of the experimental data was shifted to display a signal onset at  $\Delta t = 0$  ps and it is expected that all signal contributions arise with photoexcitation at time zero.

### 7.1 Double exponential rise

The signal arising from the temperature increase in the bulk solvent is modeled by a double exponential rise broadened by the IRF:

$$K(\Delta t) = \frac{a_1}{2} \left[ \left( 1 + \operatorname{erf} \left( \frac{\Delta t - t_0}{\sqrt{2}\sigma_{\text{IRF}}} \right) \right) - \exp \left( \frac{\sigma_{\text{IRF}}^2 - 2(\Delta t - t_0)\tau_1}{2\tau_1^2} \right) \left( 1 - \operatorname{erf} \left( \frac{\sigma_{\text{IRF}}^2 - (\Delta t - t_0)\tau_1}{\sqrt{2}\sigma_{\text{IRF}}\tau_1} \right) \right) \right] + \frac{a_2}{2} \left[ \left( 1 + \operatorname{erf} \left( \frac{\Delta t - t_0}{\sqrt{2}\sigma_{\text{IRF}}} \right) \right) - \exp \left( \frac{\sigma_{\text{IRF}}^2 - 2(\Delta t - t_0)\tau_2}{2\tau_2^2} \right) \left( 1 - \operatorname{erf} \left( \frac{\sigma_{\text{IRF}}^2 - (\Delta t - t_0)\tau_2}{\sqrt{2}\sigma_{\text{IRF}}\tau_2} \right) \right) \right], \quad (11)$$

where  $a_1$  and  $a_2$  are amplitudes,  $\tau_1$  and  $\tau_2$  are rise times,  $\Delta t$  is the time delay,  $t_0 = 0$  ps is time zero, and  $\sigma_{\text{IRF}} = 0.05$  ps is the Gaussian width of the IRF. Exp stands for exponential function, and erf for error function.

### 7.2 Single exponential rise and decay

The signal responses to vibrational relaxation,  $\Delta S_{\text{VR}}$ , and the solute and solvation shell structural rearrangements,  $\Delta S_{\text{SSR}}$ , are modeled by the sum of a single exponential rise and a single exponential decay broadened by the IRF:

$$K(\Delta t) = \frac{a}{2} \left( 1 + \operatorname{erf} \left( \frac{\Delta t - t_0}{\sqrt{2}\sigma_{\text{IRF}}} \right) \right) - \frac{a}{2} \exp \left( \frac{\sigma_{\text{IRF}}^2 - 2(\Delta t - t_0)\tau_1}{2\tau_1^2} \right) \left( 1 - \operatorname{erf} \left( \frac{\sigma_{\text{IRF}}^2 - (\Delta t - t_0)\tau_1}{\sqrt{2}\sigma_{\text{IRF}}\tau_1} \right) \right) - \frac{a}{2} \left[ 1 - \exp \left( \frac{\sigma_{\text{IRF}}^2 - 2(\Delta t - t_0)\tau_2}{2\tau_2^2} \right) \left( 1 - \operatorname{erf} \left( \frac{\sigma_{\text{IRF}}^2 - (\Delta t - t_0)\tau_2}{\sqrt{2}\sigma_{\text{IRF}}\tau_2} \right) \right) \right], \quad (12)$$

where  $a$  is the amplitude,  $\tau_1$  and  $\tau_2$  are the rise and decay time,  $\Delta t$  is the time delay,  $t_0 = 0$  ps is time zero, and  $\sigma_{\text{IRF}} = 0.05$  ps is the Gaussian width of the IRF. Exp stands for exponential function, and erf for error function.

### 7.3 Step-function rise and single exponential decay

The signal response to the optical Kerr effect in the isotropic and anisotropic difference scattering data are modeled by an instantaneous rise (step-function) and a single exponential decay broadened by the IRF (see S12 for the fitting of  $\Delta S_2$ ):

$$K(\Delta t) = \frac{a}{2} \exp\left(\frac{\sigma_{\text{IRF}}^2 - 2(\Delta t - t_0)\tau}{2\tau^2}\right) \left[1 - \text{erf}\left(\frac{\sigma_{\text{IRF}}^2 - (\Delta t - t_0)\tau}{\sqrt{2}\sigma_{\text{IRF}}\tau}\right)\right] + C, \quad (13)$$

where  $a$  is the amplitude,  $\tau$  is the decay time,  $\Delta t$  is the time delay,  $t_0 = 0$  ps is time zero, and  $\sigma_{\text{IRF}} = 0.05$  ps is the Gaussian width of the IRF.  $C$  stands for a constant offset that is included in the modeling of the signal response in the anisotropic difference scattering data,  $\Delta S_2$ , but is set to  $C = 0$  when modeling the signal response to the optical Kerr effect in the isotropic data. Exp stands for exponential function, and erf for error function.

## 8 Energy deposition into the solvent

The change in temperature in the solvent expected from the absorption of a photon of a specific wavelength can be calculated by

$$\Delta T = \frac{E_{\text{photon}} \cdot N_{\text{A}}}{C_V} \cdot \frac{M \cdot c}{\rho} \cdot \alpha,$$

where  $E_{\text{photon}}$  is the photon energy corresponding to the excitation wavelength,  $N_{\text{A}}$  is Avogadro constant,  $C_V$  is the heat capacity of the solvent at constant volume,  $M$  is the molar mass of the solvent,  $\rho$  is the density of the solvent,  $c$  is the concentration of the solute and  $\alpha$  is the fraction of excited molecules.

For the presented scattering experiments with laser excitation at 470 nm,  $E_{\text{photon}} = 2.64$  eV. The sample was a 3 mM solution of HTI-J in acetonitrile, so  $C_V = 63.53$  J/mol/K [28],  $M = 41.05$  g/mol,  $\rho = 786$  g/L [14], and  $c = 3$  mM. Given these parameters and setting  $\alpha = 1$ , corresponding to 100% excitation fraction, the maximum expected change in solvent temperature based on one-photon excitation is around 0.6 K. The temperature change observed from fitting the experimental data is around 1.2 K, which is double the maximum expected temperature change.

The discrepancy is mainly attributed to multi-photon excitation, a nonlinear optical process where the solute absorbs two or more photons and is promoted to a higher lying excited state. The excess energy is dissipated to the solvent through vibrational relaxation in the lowest lying excited state, leading to an additional temperature increase in the bulk solvent. While the power titration (see Fig. S8) suggests that the solution was excited in a linear regime, the laser excitation power is close to the upper limit of the linear range. For this reason, and considering possible uncertainties in the power titration, it can not be excluded that multi-photon excitation took place. Part



of the discrepancy might also arise from uncertainty in the sample concentration and scaling of the experimental data to the liquid unit cell (Supplementary Note 4.4) and the  $\Delta S_{\Delta T}$  reference (Supplementary Note 5.1).

## 9 Density functional theory calculations

Fig. S23 shows an analysis of the basis set convergence for the orbital-optimized excited state calculations of HTI-J in acetonitrile using the CAM-B3LYP functional and the conductor-like polarizable continuum model (CPCM) for the solvent. The vertical

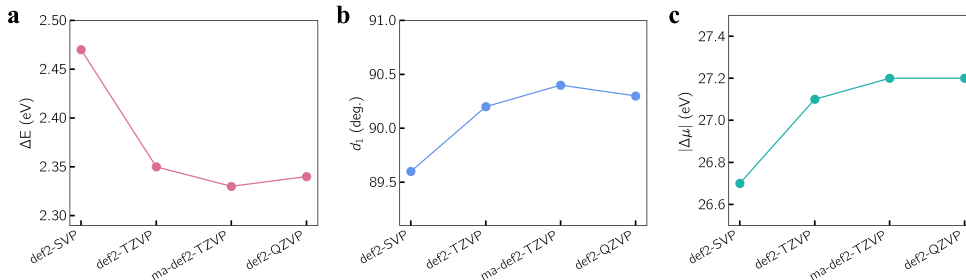

**Fig. S23** Basis set convergence for **a** the vertical excitation energy, **b** dihedral angle of the single bond twist of the optimized excited state geometry, and **c** the magnitude of the change in the dipole moment between the optimized excited and ground state, for the S1 excited state of HTI-J in acetonitrile using orbital-optimized calculations with CAM-B3LYP/CPCM.

excitation energy, single bond twist dihedral angle,  $d_1$ , of the optimized geometry, and the magnitude of the change in the dipole moment between the optimized ground and excited state, for the first excited state, S1, are plotted as a function of the basis set. The single bond twist dihedral angle  $d_1$  is defined by atoms C2, C3, C4 and C5 as shown in Fig. S24. The changes between def2-TZVP, ma-def2-TZVP, and def2-QZVP are small for all the considered quantities. Satisfactory convergence is reached with the minimally augmented ma-def2-TZVP basis set, which includes diffuse functions and is chosen for all calculations discussed further here and in the main article.

The optimized ground state minimum geometry corresponds to the *Z* isomer and is shown in Fig. S24 together with the optimized geometry of the *E* isomer. The two isomers differ by a twist around the carbon-carbon double bond between the thioindigo and stilbene fragments, as described by the dihedral angle  $d_2$  (atoms C1, C2, C3, and H1).

The excitation energy and the oscillator strength for the three lowest excited states obtained from linear-response TDDFT calculations with the CPCM implicit solvent model for acetonitrile are shown in Table S3. The first excited state shows a large oscillator strength, and has an excitation energy closest to the position of the maximum of the experimental absorption spectrum, 470 nm (2.64 eV), whereas the higher-energy states have oscillator strengths close to zero, indicating that the one-photon excitation by the pump pulse in the TAS and TR-XSS experiments is to the lowest excited state.

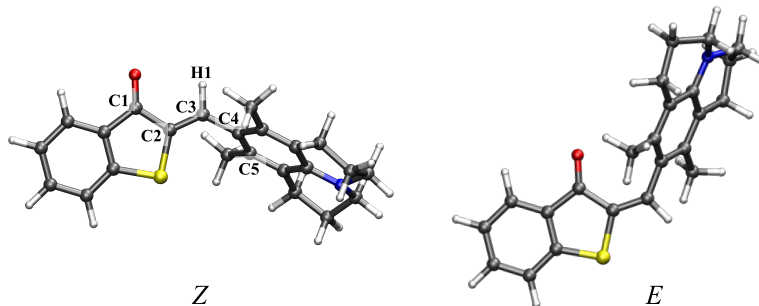

**Fig. S24** The ground state structures for the *Z* and *E* isomers for the HTI-J optimized with CAM-B3LYP/ma-def2-TZVP/CPCM. Atom colors: C gray, H white, N blue, O red, S yellow. The labeled atoms define the relevant dihedral angles: single bond twist  $d_1$  (C2-C3-C4-C5), and double bond twist  $d_2$  (C1-C2-C3-H1).

**Table S3** Vertical excitation energy and oscillator strength of the first excited state of HTI-J in acetonitrile obtained from linear-response TDDFT and orbital-optimized (OO) calculations with CAM-B3LYP/ma-def2-TZVP/CPCM. TDDFT results for the second and third excited states are also shown.

|    | $\Delta E$ (eV)   |       |      | $f$   |
|----|-------------------|-------|------|-------|
|    | OO                | TDDFT | exp. | TDDFT |
| S1 | 2.33 <sup>a</sup> | 3.08  | 2.64 | 0.43  |
| S2 | -                 | 3.52  | -    | 0.01  |
| S3 | -                 | 3.83  | -    | 0.02  |

<sup>a</sup> including full (fast and slow) solvent response within the CPCM model in the excited state

The equilibrium geometries and partial charges used in the MD simulations were obtained from ground state and orbital-optimized excited state calculations. Both the ground and S1 geometries were fully optimized in acetonitrile described with the CPCM implicit solvent model. Orbital-optimized calculations with the CAM-B3LYP functional have been shown to produce accurate excitation energies and charge distributions for long-range charge transfer excited states in organic molecules [29, 30]. Table S3 shows the vertical excitation energy for the lowest excited state obtained with the orbital-optimized approach. For the excitation energy, the spin-purification formula is applied to obtain the energy of the singlet excited state  $E_s$  from the energies of spin-mixed and triplet calculations,  $E_m$  and  $E_t$  [31]:

$$E_s = 2E_m - E_t. \quad (14)$$

where  $E_m$  is obtained in a calculation where one electron is excited in one spin channel, while  $E_t$  is obtained in a calculation where one electron is excited from one spin channel to the other. The excited state calculations include both the fast and slow

response of the solvent in the implicit CPCM solvent model, representing the solvent being in equilibrium with the solute, instead of only the fast, electronic response corresponding to the vertical excitation. This might explain the underestimation of the vertical excitation energy by the calculations. Table S4 shows the dihedral angles  $d_1$  and  $d_2$ , and change in the dipole moment between the ground and S1 state both at the Franck-Condon (FC) geometry and the S1 minimum. The excited state geometry was optimized using the mixed-spin calculations only and the excited state dipole moment corresponds to the dipole moment of the spin-mixed solution. The S1 minimum

**Table S4** Magnitude of the dipole moment change, single and double bond twist dihedral angles ( $d_1$  and  $d_2$ ) for the FC geometry and the optimized geometry of the S1 excited state of HTI-J in acetonitrile obtained from orbital-optimized calculations with CAM-B3LYP/ma-def2-TZVP/CPCM.

|                   | FC   | S1 min. |
|-------------------|------|---------|
| $ \Delta\mu $ (D) | 23.0 | 27.2    |
| $ d_1 $ (deg.)    | 60.7 | 90.4    |
| $ d_2 $ (deg.)    | 1.3  | 0.5     |

geometry has  $d_1 = 90.4^\circ$ , corresponding to a twisting to a  $\sim 90$ -degree geometry upon photoexcitation. The dipole moments for the ground state and S1 excited state at the FC geometry, obtained from calculations for the spin-mixed state, are shown in Fig. S25. The large change in the dipole moment between the ground and S1 state shows

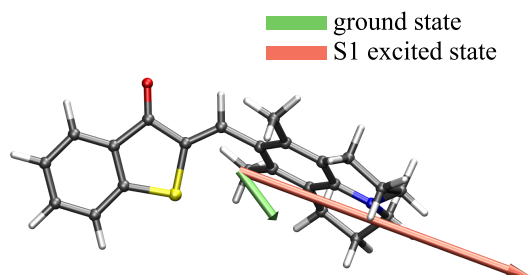

**Fig. S25** Electric dipole moments of the ground state (green) and the S1 excited state at the ground state geometry (orange), the latter obtained from orbital-optimized calculations. All calculations use CAM-B3LYP/ma-def2-TZVP/CPCM.

that the excited state has strong charge transfer character.

Table S5 shows the point charges of three selected atoms, oxygen and sulfur of the thioindigo fragment, and nitrogen of the julolidine fragment, used for the HTI-J

**Table S5** Point charges in units of  $e$  of the oxygen, nitrogen and sulfur atoms, as well as total charges of the thioindigo and julolidine fragments for the ground and S1 excited states of HTI-J in acetonitrile used in the MD simulations.

|            | GS    | CT    |
|------------|-------|-------|
| O          | -0.62 | -0.83 |
| S          | -0.09 | -0.19 |
| N          | -0.05 | 0.33  |
| thioindigo | -0.34 | -1.02 |
| julolidine | 0.34  | 1.02  |

ground and excited states in the MD simulations. The point charges are obtained from the DFT optimized ground and S1 states using the CHELPG method [32]. An electronic charge of  $0.72 e$  is transferred from the julolidine to the thioindigo fragment, making the former more positively charged and the latter more negatively charged. The partial charges for the three selected atoms show this charge transfer, the nitrogen having an especially large change in the partial charge, going from slightly negative to significantly positive.

## 10 Molecular dynamics simulations

### 10.1 Equilibrium molecular dynamics simulations

Fig. S26 shows the difference scattering signals calculated from equilibrium MD simulations for the ground state and for three different models for the excited state. In the first model (“Twist and CT”), both partial charges and geometry are changed in the excited state simulations compared to the ground state, based on the orbital-optimized density functional excited state calculations presented in the previous sections. In the second model (“CT only”), only the partial charges are changed, and the ground state geometry is retained. Finally, in the third model (“Twist only”), only the geometry is changed, retaining the partial charges of the ground state. The terms calculated from the solute-solute RDFs (in orange) and the solute-solvent RDFs (in blue) are shown separately, as well as their sum (in black).

To quantify changes upon excitation in the volume around the HTI-J excluded to the solvent, the number density  $n$  of the solvent atoms, averaged over all the frames in the MD trajectory, was calculated for the ground state and the three different models used for the excited state. We define the excluded volume as the volume of the region around the solute where  $n < 0.01 \text{ \AA}^{-3}$ , corresponding to less than 1 % probability of finding a solvent atom. The surface corresponding to  $n = 0.01 \text{ \AA}^{-3}$  for the twist and charge transfer model of the excited states of HTI-J is shown in Fig. S27. The excluded volume is obtained as the volume of the region enclosed by this surface. As table S6 shows, twisting of the HTI-J has a minimal effect on the excluded volume, whereas

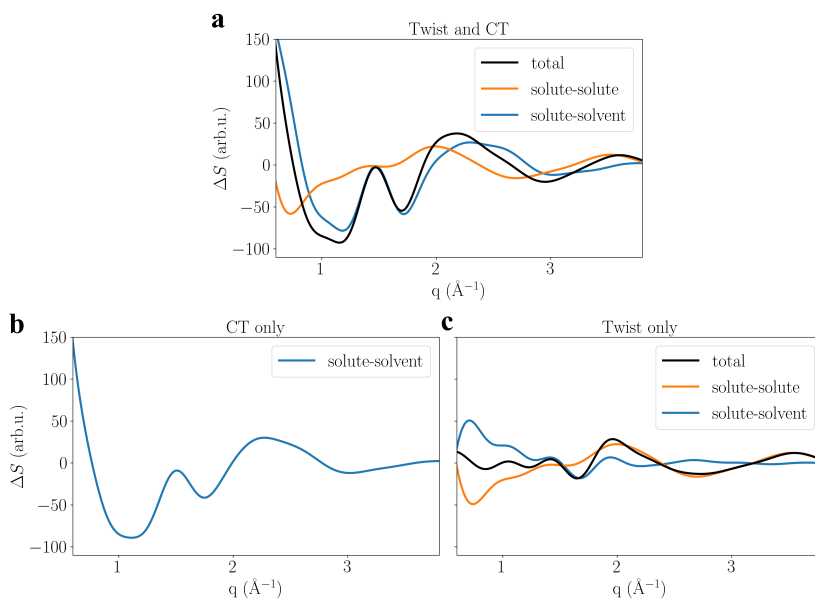

**Fig. S26** Difference scattering curves calculated from the equilibrium molecular dynamics simulations for the three different models representing the excited state; **a** intramolecular charge transfer and twisting (changing both partial charges and geometry compared to the ground state), **b** only charge transfer (changing only partial charges), and **c** only twist (changing only geometry). The scattering signals calculated from solute-solute (orange curve) and solute-solvent (blue curve) radial distribution functions are shown separately, as well as the total scattering signal that is the sum of these contributions (black curve).

charge transfer causes the excluded volume to decrease. This is attributed to the rearrangement of the polar acetonitrile molecules as a response of the thioindigo and julolidine fragments HTI-J getting more positively and negatively charged, respectively, causing the solvent molecules to get closer to the solute on average.

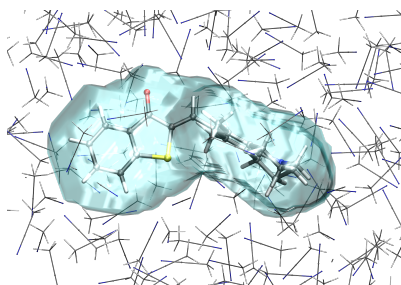

**Fig. S27** The cyan isosurface shows the surface around the HTI-J where the number density of the solvent is  $0.01 \text{ \AA}^{-3}$ , as obtained from the molecular dynamics simulations with a charge transfer and twist model of the excited state. The excluded volume is calculated as the volume of the region enclosed by this surface (see Table S6).

**Table S6** Excluded volume, calculated from the equilibrium molecular dynamics simulations as the volume of the region around the HTI-J where the number density of the solvent atoms is less than  $0.01 \text{ \AA}^{-3}$ . The values are shown for the ground state and the three models for the excited state.

|              | Excluded volume ( $\text{\AA}^3$ ) |
|--------------|------------------------------------|
| GS           | 415                                |
| Twist only   | 415                                |
| CT only      | 403                                |
| Twist and CT | 404                                |

## 10.2 Nonequilibrium molecular dynamics simulations

Fig. S28 shows the time evolution of the kinetic energy of the HTI-J molecule and the acetonitrile solvent molecules obtained in the nonequilibrium MD simulations of vibrational cooling and heat transfer to the solvent. In the simulations, an energy of

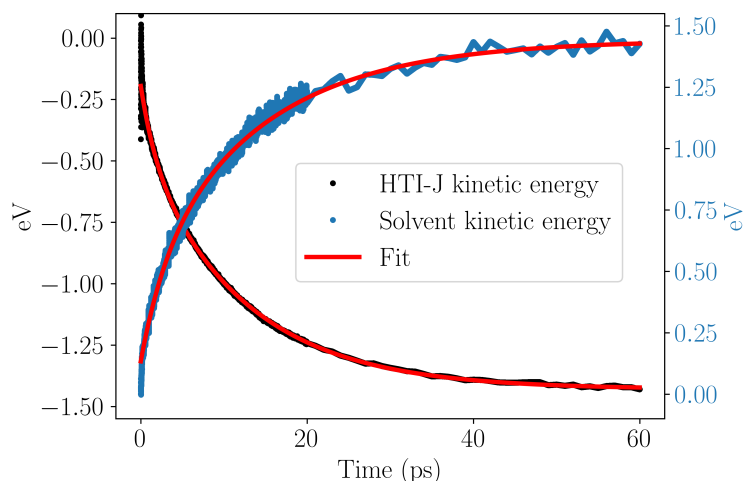

**Fig. S28** Time evolution of the kinetic energy of HTI-J (black dots) and the acetonitrile solvent molecules (blue dots) obtained in nonequilibrium molecular dynamics simulations after a 2.64 eV instantaneous vibrational excitation of HTI-J in the ground state. The red lines represent best-fitting curves of a biexponential fit.

2.64 eV, corresponding to the photon energy of the laser pump pulse, is instantaneously deposited as vibrational kinetic energy in the solute in the ground electronic state. Initially, roughly half of the total excess energy is rapidly transformed into potential energy of the system. The other half leads to a corresponding increase in the kinetic energy of the solvent. A biexponential fit to the time-dependent kinetic energy of the solute after the rapid conversion into potential energy gives two time constants,

$1.80 \pm 0.02$  ps and  $12.18 \pm 0.01$  ps. A biexponential fit of the time-dependent solvent kinetic energy gives time constants of  $2.95 \pm 0.04$  ps and  $14.17 \pm 0.05$  ps.

## References

- [1] Li, T.-y., Muthiah Ravinson, D. S., Haiges, R., Djurovich, P. I. & Thompson, M. E. Enhancement of the luminescent efficiency in carbene-au(i)-aryl complexes by the restriction of renner–teller distortion and bond rotation. *Journal of the American Chemical Society* **142**, 6158–6172 (2020).
- [2] Dance, Z. E. X. *et al.* Direct observation of the preference of hole transfer over electron transfer for radical ion pair recombination in donor-bridge-acceptor molecules. *Journal of the American Chemical Society* **130**, 830–832 (2008).
- [3] Wiedbrauk, S. *et al.* Twisted hemithioindigo photoswitches: solvent polarity determines the type of light-induced rotations. *Journal of the American Chemical Society* **138**, 12219–12227 (2016).
- [4] Zweig, J. E. & Newhouse, T. R. Isomer-specific hydrogen bonding as a design principle for bidirectionally quantitative and redshifted hemithioindigo photoswitches. *Journal of the American Chemical Society* **139**, 10956–10959 (2017).
- [5] Müller, C., Pascher, T., Eriksson, A., Chabera, P. & Uhlig, J. KiMoPack: A python package for kinetic modeling of the chemical mechanism. *The Journal of Physical Chemistry A* **126**, 4087–4099 (2022).
- [6] Ekvall, K. *et al.* Cross phase modulation artifact in liquid phase transient absorption spectroscopy. *Journal of Applied Physics* **87**, 2340–2352 (2000).
- [7] Lorenc, M. *et al.* Artifacts in femtosecond transient absorption spectroscopy. *Applied Physics B: Lasers and Optics* **74**, 19–27 (2002).
- [8] Ashiotis, G. *et al.* The fast azimuthal integration python library: pyfai. *Journal of Applied Crystallography* **48**, 510–519 (2015).
- [9] Harmand, M. *et al.* Achieving few-femtosecond time-sorting at hard x-ray free-electron lasers. *Nature Photonics* **7**, 215–218 (2013).
- [10] Biasin, E. *et al.* Anisotropy enhanced x-ray scattering from solvated transition metal complexes. *Journal of Synchrotron Radiation* **25**, 306–315 (2018).
- [11] Lorenz, U., Møller, K. B. & Henriksen, N. E. On the interpretation of time-resolved anisotropic diffraction patterns. *New Journal of Physics* **12**, 113022 (2010).
- [12] Ki, H. *et al.* Optical kerr effect of liquid acetonitrile probed by femtosecond time-resolved x-ray liquidography. *Journal of the American Chemical Society* **143**, 14261–14273 (2021).

- [13] Haldrup, K., Christensen, M. & Nielsen, M. M. Analysis of time-resolved x-ray scattering data from solution-state systems. *Acta Crystallographica Section A* **66**, 261–269 (2010).
- [14] Haynes, W. M. (ed.) *CRC Handbook of Chemistry and Physics* 95 edn (CRC Press, 2014).
- [15] Kjær, K. S. *et al.* Introducing a standard method for experimental determination of the solvent response in laser pump, x-ray probe time-resolved wide-angle x-ray scattering experiments on systems in solution. *Physical Chemistry Chemical Physics* **15**, 15003–15016 (2013).
- [16] Debye, P. Zerstreuung von röntgenstrahlen. *Annalen der Physik* **351**, 809–823 (1915).
- [17] Haldrup, K. Singular value decomposition as a tool for background corrections in time-resolved xfel scattering data. *Philosophical Transactions of the Royal Society B: Biological Sciences* **369** (2014).
- [18] Hendler, R. W. & Shrager, R. I. Deconvolutions based on singular value decomposition and the pseudoinverse: a guide for beginners. *Journal of Biochemical and Biophysical Methods* **28**, 1–33 (1994).
- [19] Brandt van Driel, T. *et al.* Disentangling detector data in XFEL studies of temporally resolved solution state chemistry. *Faraday discussions* **177**, 443–65 (2015). URL <http://pubs.rsc.org/en/content/articlehtml/2015/fd/c4fd00203b>.
- [20] Dent, A. J., Stephenson, P. C. & Greaves, G. N. The extraction of signal to noise values in x-ray absorption spectroscopy. *Review of Scientific Instruments* **63**, 856–858 (1992).
- [21] Stallhofer, K. *et al.* Electronic and geometric characterization of tict formation in hemithioindigo photoswitches by picosecond infrared spectroscopy. *The Journal of Physical Chemistry A* **125**, 4390–4400 (2021).
- [22] Nguyen, S. C., Lomont, J. P., Caplins, B. W. & Harris, C. B. Studying the dynamics of photochemical reactions via ultrafast time-resolved infrared spectroscopy of the local solvent. *Journal of Physical Chemistry Letters* **5**, 2974–2978 (2014).
- [23] Zhang, Y., Chen, J. & Kohler, B. Hydrogen bond donors accelerate vibrational cooling of hot purine derivatives in heavy water. *Journal of Physical Chemistry A* **117**, 6771–6780 (2013).
- [24] Middleton, C. T., Cohen, B. & Kohler, B. Solvent and solvent isotope effects on the vibrational cooling dynamics of a dna base derivative. *Journal of Physical Chemistry A* **111**, 10460–10467 (2007).



- [25] Ruckebusch, C., Sliwa, M., Pernot, P., de Juan, A. & Tauler, R. Comprehensive data analysis of femtosecond transient absorption spectra: A review. *Journal of Photochemistry and Photobiology C: Photochemistry Reviews* **13**, 1–27 (2012).
- [26] Hansen, P. C. & O’Leary, D. P. The use of the l-curve in the regularization of discrete ill-posed problems. *SIAM Journal on Scientific Computing* **14**, 1487–1503 (1993).
- [27] Regińska, T. A regularization parameter in discrete ill-posed problems. *SIAM Journal on Scientific Computing* **17**, 740–749 (1996).
- [28] Nakamura, M., Chubachi, K., Tamura, K. & Murakami, S. Thermodynamic properties of  $[x\text{HCON}(\text{CH}_3)_2 \text{ or } \text{CH}_3\text{CN} + (1-x)(\text{ch}_3)_2\text{so}]$  at the temperature 298.15 k. *The Journal of Chemical Thermodynamics* **25**, 1311–1318 (1993).
- [29] Paetow, L. & Neugebauer, J. Excited state dipole moments from  $\Delta\text{SCF}$ : a benchmark. *Physical Chemistry Chemical Physics* (2025).
- [30] Selenius, E., Sigurdarson, A. E., Schmerwitz, Y. L. & Levi, G. Orbital-optimized versus time-dependent density functional calculations of intramolecular charge transfer excited states. *Journal of Chemical Theory and Computation* **20**, 3809–3822 (2024).
- [31] Ziegler, T., Rauk, A. & Baerends, E. J. On the calculation of multiplet energies by the hartree-fock-slater method. *Theor. Chim. Acta* **43**, 261–271 (1977).
- [32] Breneman, C. M. & Wiberg, K. B. Determining atom-centered monopoles from molecular electrostatic potentials. the need for high sampling density in formamide conformational analysis. *Journal of Computational Chemistry* **11**, 361–373 (1990).
